# Supplementary material for: An unusual 1,2-aryl shift in palladium-catalyzed cross-coupling ethoxycarbonylation of arylboronic acids with α-iminoesters
Source: Royal Society of Chemistry journal article supplement (doi:10.1039/c3ob41011k), 2013-01-01

# An Unusual 1, 2-Aryl Shift in Palladium-Catalyzed Cross-Coupling

## Ethoxycarbonylation of Arylboronic Acids with $\alpha$ -Iminoesters

Cheng Qian,<sup>a</sup> Jiayan Chen,<sup>a</sup> Meiqin Fu,<sup>a</sup> Shiya Zhu,<sup>a</sup> Wen-Hua Chen,<sup>b</sup> Huanfeng Jiang,<sup>a</sup> and Wei Zeng<sup>a,\*</sup>

<sup>a</sup>School of Chemistry and Chemical Engineering, South China University of Technology, Guangzhou, P. R. China, 510641; E-mail: zengwei@scut.edu.cn

<sup>b</sup>School of Pharmaceutical Sciences, Southern Medical University, Guangzhou 510515, P. R. China

### Supporting Information

#### Table of Contents

|                                                                                                                                                                                    |   |
|------------------------------------------------------------------------------------------------------------------------------------------------------------------------------------|---|
| 1. General experimental information .....                                                                                                                                          | 2 |
| 1.1 Table 1. The effect of substituent groups on the aryl ring of arylboronic acid on the cross-coupling ethoxycarbonylation of arylboronic acids with $\alpha$ -iminoesters ..... | 2 |
| 1.2 Table 2. The effect of solvents on the cross-coupling ethoxycarbonylation of arylboronic acids with $\alpha$ -iminoesters .....                                                | 2 |
| 1.3. Table 3. Catalyst screening for the cross-coupling ethoxycarbonylation of arylboronic acids with $\alpha$ -iminoesters .....                                                  | 2 |
| 1.4 Table 4. Ligand screening for the cross-coupling ethoxycarbonylation of arylboronic acids with $\alpha$ -iminoesters .....                                                     | 3 |
| 1.5. Table 5. The effect of temperature on the cross-coupling ethoxycarbonylation of arylboronic acids with $\alpha$ -iminoesters .....                                            | 3 |
| 1.6. The mechanism exploration of Pd(II)-catalyzed cross-coupling ethoxycarbonylation of arylboronic acids with $\alpha$ -iminoesters .....                                        | 4 |
| 1.6.1 The GC spectra about the the reaction progress of $\alpha$ -iminoesters ( <b>1a</b> ) and phenylboronic acid ( <b>2a</b> ) (see Scheme 1) .....                              | 4 |
| 2. <sup>1</sup> H NMR and <sup>13</sup> C NMR Spectrum for products.....                                                                                                           | 8 |

## 1. General experimental information

### 1.1 Table 1. <sup>a</sup>The effect of substituent groups on the aryl ring of arylboronic acid on the cross-coupling ethoxycarbonylation of arylboronic acids with $\alpha$ -iminoesters

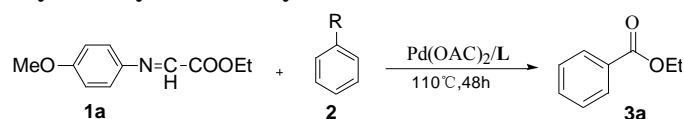

| entry | Pd salts             | R                  | L                 | Yield (%) <sup>b</sup> |
|-------|----------------------|--------------------|-------------------|------------------------|
| 1     | Pd(OAc) <sub>2</sub> | Br                 | Ph <sub>3</sub> P | 0                      |
| 2     | Pd(OAc) <sub>2</sub> | I                  | Ph <sub>3</sub> P | 0                      |
| 3     | Pd(OAc) <sub>2</sub> |                    | --                | 0                      |
| 4     | Pd(OAc) <sub>2</sub> | B(OH) <sub>2</sub> | --                | 8                      |

<sup>a</sup>Reaction conditions: **1a** (0.18 mmol), **2** (0.18 mmol), Pd(TFA)<sub>2</sub> (5 mol %), **L** (5 mol %), solvent: CH<sub>3</sub>NO<sub>2</sub> (3.0 mL). All reactions were carried out at 110°C for 48 h in sealed tube. <sup>b</sup>Isolated yield after purification; L = ligand.

### 1.2 Table 2. <sup>a</sup>The effect of solvents on the cross-coupling ethoxycarbonylation of arylboronic acids with $\alpha$ -iminoesters

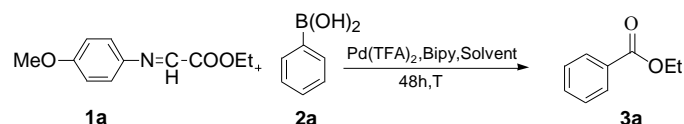

| entry | solvent                         | temp.(°C) | yield (%) <sup>b</sup> |
|-------|---------------------------------|-----------|------------------------|
| 1     | CH <sub>3</sub> NO <sub>2</sub> | 110       | 91                     |
| 2     | DMF                             | 140       | --                     |
| 3     | toluene                         | 140       | 21                     |
| 4     | TCE                             | 110       | 27                     |
| 5     | CH <sub>3</sub> CN              | 100       | 23                     |
| 6     | CH <sub>3</sub> OH              | 80        | trace                  |

<sup>a</sup>Reaction conditions: **1a** (0.18 mmol), **2a** (0.18 mmol), Pd(TFA)<sub>2</sub> (5 mol %), bipy (5 mol %), solvent (3.0 mL). All reactions were carried out at the given temperature for 48 h in sealed tube. <sup>b</sup>Isolated yield after purification. bipy = 2,2'-bipyridine.

### 1.3. Table 3. <sup>a</sup>Catalyst screening for the cross-coupling ethoxycarbonylation of arylboronic acids with $\alpha$ -iminoesters

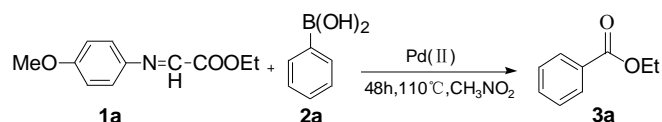

| entry | Pd salts                                            | Yield (%) <sup>b</sup> |
|-------|-----------------------------------------------------|------------------------|
| 1     | Pd(OAc) <sub>2</sub>                                | 8                      |
| 2     | Pd(TFA) <sub>2</sub>                                | 13                     |
| 3     | PdCl <sub>2</sub>                                   | 27                     |
| 4     | PdCl <sub>2</sub> (CH <sub>3</sub> CN) <sub>2</sub> | 35                     |
| 5     | PdCl <sub>2</sub> (PhCN) <sub>2</sub>               | 37                     |
| 6     | PdCl <sub>2</sub> (PPh <sub>3</sub> )               | --                     |

|   |                                                         |     |
|---|---------------------------------------------------------|-----|
| 7 | $\text{PdCl}_2(\text{CH}_2\text{CH}_3)(\text{PPh}_2)_2$ | <10 |
|---|---------------------------------------------------------|-----|

<sup>a</sup>Reaction conditions: **1a** (0.18 mmol), **2a** (0.18 mmol), Pd salts (5 mol %), solvent:  $\text{CH}_3\text{NO}_2$  (3.0 mL). All reactions were carried out at 110°C for 48 h in a sealed tube. <sup>b</sup>Isolated yield after purification.

**1.4 Table 4. <sup>a</sup>Ligand screening for the cross-coupling ethoxycarbonylation of arylboronic acids with  $\alpha$ -iminoesters**

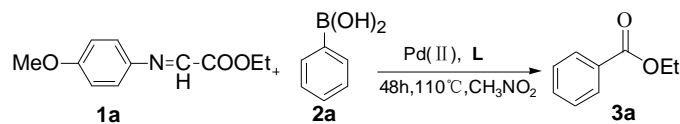

| entry | Pd salts                                | ligand                | Yield (%) <sup>b</sup> |
|-------|-----------------------------------------|-----------------------|------------------------|
| 1     | $\text{Pd}(\text{TFA})_2$               | <b>L</b> <sub>1</sub> | 61                     |
| 2     | $\text{Pd}(\text{TFA})_2$               | <b>L</b> <sub>2</sub> | 16                     |
| 3     | $\text{Pd}(\text{TFA})_2$               | <b>L</b> <sub>3</sub> | 11                     |
| 4     | $\text{Pd}(\text{TFA})_2$               | <b>L</b> <sub>4</sub> | 17                     |
| 5     | $\text{Pd}(\text{TFA})_2$               | <b>L</b> <sub>5</sub> | <10                    |
| 6     | $\text{Pd}(\text{TFA})_2$               | <b>L</b> <sub>6</sub> | 35                     |
| 7     | $\text{Pd}(\text{TFA})_2$               | <b>L</b> <sub>7</sub> | 91                     |
| 8     | $\text{Pd}(\text{TFA})_2$               | <b>L</b> <sub>8</sub> | 81                     |
| 9     | $\text{PdCl}_2$                         | <b>L</b> <sub>7</sub> | 27                     |
| 10    | $\text{PdCl}_2(\text{CH}_3\text{CN})_2$ | <b>L</b> <sub>7</sub> | 53                     |
| 11    | $\text{PdCl}_2(\text{PhCN})_2$          | <b>L</b> <sub>7</sub> | --                     |

<sup>a</sup>Reaction conditions: **1a** (0.18 mmol), **2a** (0.18 mmol),  $\text{Pd}(\text{TFA})_2$  (5 mol %), **L** (5 mol %), solvent (3.0 mL). All reactions were carried out at 110°C for 48 h in sealed tube. <sup>b</sup>Isolated yield after purification; **L** = ligand.

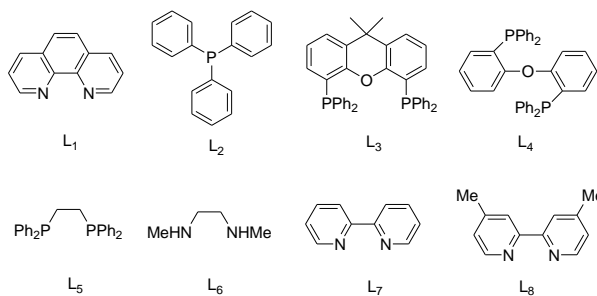

**1.5. Table 5. <sup>a</sup>The effect of temperature on the cross-coupling ethoxycarbonylation of arylboronic acids with  $\alpha$ -iminoesters**

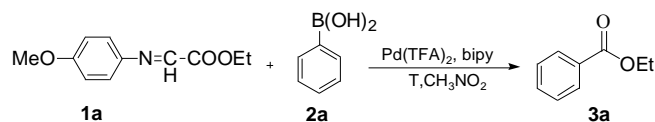

| entry | solvent                  | Temp.(°C) | yield (%) <sup>b</sup>               |
|-------|--------------------------|-----------|--------------------------------------|
| 1     | $\text{CH}_3\text{NO}_2$ | 60        | 0                                    |
| 2     | $\text{CH}_3\text{NO}_2$ | 90        | 37 <sup>c</sup> (45 <sup>c,d</sup> ) |
| 3     | $\text{CH}_3\text{NO}_2$ | 100       | 56                                   |
| 4     | $\text{CH}_3\text{NO}_2$ | 110       | 91                                   |

|   |                                 |     |    |
|---|---------------------------------|-----|----|
| 5 | CH <sub>3</sub> NO <sub>2</sub> | 120 | 77 |
|---|---------------------------------|-----|----|

<sup>a</sup>Reaction conditions: **1a** (0.174 mmol), **2a** (0.174 mmol), Pd(TFA)<sub>2</sub> (5 mol %), bipy (5 mol %), solvent: CH<sub>3</sub>NO<sub>2</sub> (3.0 mL). All reactions were carried out at the given temperature for 48 h in sealed tube unless otherwise noted. <sup>b</sup>Isolated yield after purification. <sup>c</sup>The reaction temperature is 90 °C. <sup>d</sup>The yield of by product α- (4- methoxyphenylamino)- α- phenyl- acetic acid ethyl ester. bipy = 2,2'- bipyridine.

## 1.6. The mechanism exploration of Pd(II)-catalyzed cross-coupling ethoxycarbonylation of arylboronic acids with α-iminoesters

### 1.6.1 The GC spectra about the the reaction progress of α-iminoesters (**1a**) and phenylboronic acid (**2a**) (see Scheme 1)

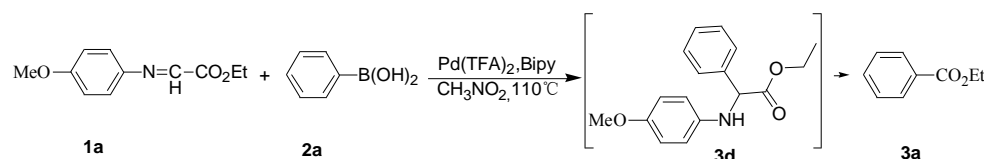

**Scheme 1**

To the solution of α- iminoesters **1a** (0.2 mmol, 1.0 equiv) of CH<sub>3</sub>NO<sub>2</sub> (2.0 mL), phenylboronic acid **2a** (0.2 mmol, 1.0 equiv), Pd(TFA)<sub>2</sub> (0.01 mmol, 5 mol %) and bipy (0.01 mmol, 5 mol %) was added under Ar atmosphere. Then the mixture was stirred at 110 °C for a given time, the corresponding reaction progress was monitored by GC-MS. The effect of reaction time on the GC yield of **3a** and **3d** was listed in Table 7, and the corresponding GC spectra were shown in Figure 1-6. The GC-MS spectra of **3a** and **3d** were shown in Figure 7-8.

Table 7. The effect of reaction on the GC yield of **3a** and **3d**

| Entry | Reaction time (h) | Retention time (min) |           | GC yield (%) |           |
|-------|-------------------|----------------------|-----------|--------------|-----------|
|       |                   | <b>3a</b>            | <b>3d</b> | <b>3a</b>    | <b>3d</b> |
| 1     | 2                 | 2.72                 | 6.31      | 15           | 70        |
| 2     | 5                 | 2.64                 | 6.31      | 30           | 65        |
| 3     | 8                 | 2.65                 | 6.32      | 46           | 48        |
| 4     | 12                | 2.69                 | 6.31      | 54           | 35        |
| 5     | 26                | 2.64                 | 6.37      | 87           | 5         |
| 6     | 48                | 2.65                 | 6.35      | >95          | 0         |

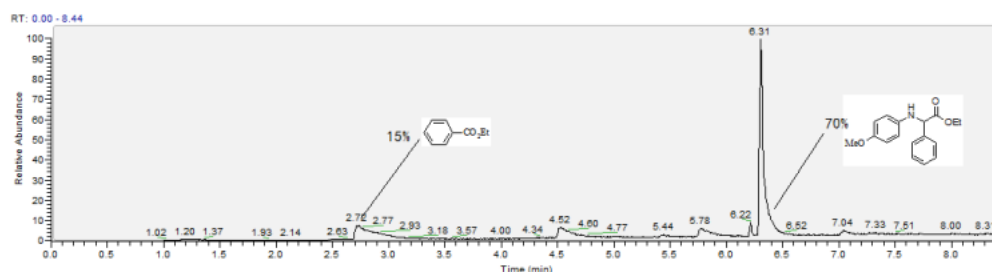

**Figure 1.** The GC spectra from the reaction mixture which was carried out for 2 h.

As shown in Figure 1, the GC yield of intermediate (4-methoxy-phenylamino)-phenyl-acetic acid ethyl ester **3d** was up to 70%, and the GC yield of ethyl benzoate **3a** was just 15%.

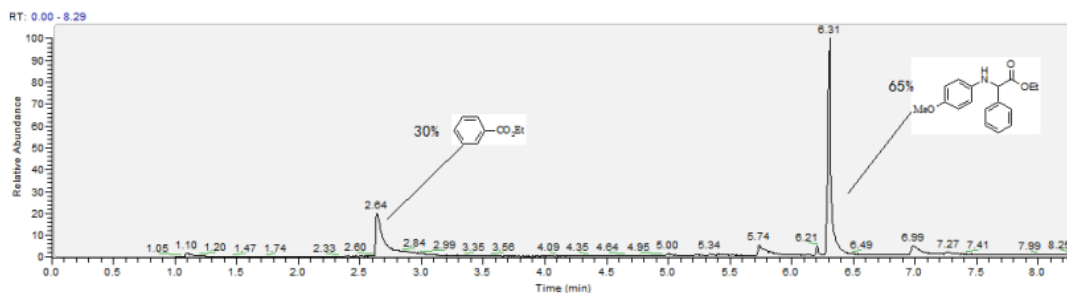

**Figure 2.** The GC spectra from the reaction mixture which was carried out for 5 h.

As shown in **Figure 2**, the GC yield of intermediate (4-methoxy-phenylamino)-phenyl-acetic acid ethyl ester **3d** was lowered to 65%, and the GC yield of ethyl benzoate **3a** was up to 30%.

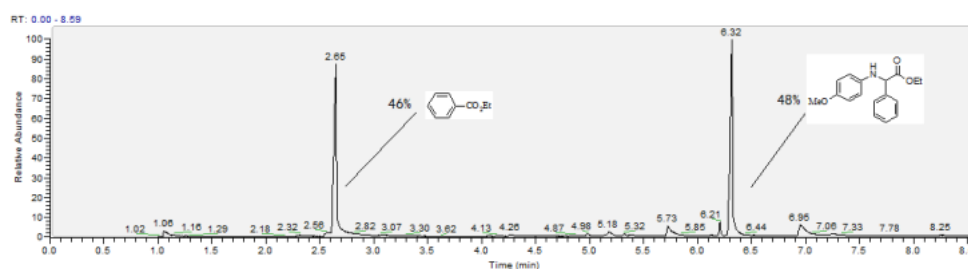

**Figure 3.** The GC spectra from the reaction mixture which was carried out for 8 h.

As shown in **Figure 3**, the GC yield of intermediate (4-methoxy-phenylamino)-phenyl-acetic acid ethyl ester **3d** was lowered to 48%, and the yield of ethyl benzoate **3a** was up to 46%.

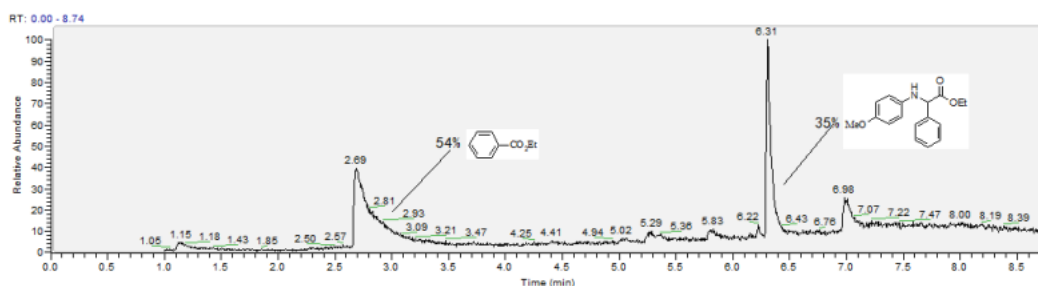

**Figure 4.** The GC spectra from the reaction mixture which was carried out for 12 h.

As shown in **Figure 4**, the GC yield of intermediate (4-methoxy-phenylamino)-phenyl-acetic acid ethyl ester **3d** was lowered to 35%, and the GC yield of ethyl benzoate **3a** was up to 54%.

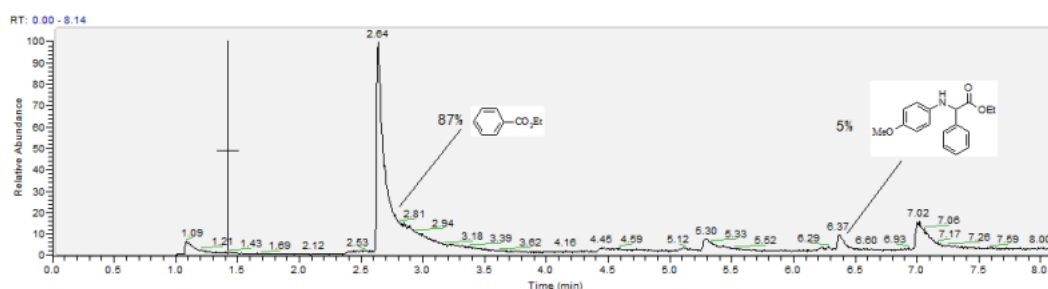

**Figure 5.** The GC spectra from the reaction mixture which was carried out for 26 h.

As shown in **Figure 5**, the GC yield of intermediate (4-methoxy-phenylamino)-phenyl-acetic acid ethyl ester **3d** was lowered to 5%, and the GC yield of ethyl benzoate **3a** was up to 87%.

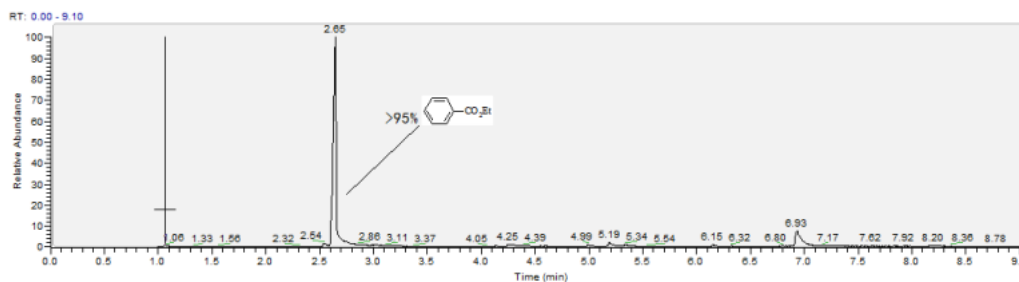

**Figure 6.** The GC spectra from the reaction mixture which was carried out for 48 h.

As shown in **Figure 6**, the intermediate (4-methoxy-phenylamino)-phenyl-acetic acid ethyl ester **3d** basically disappeared, and the GC yield of ethyl benzoate **3a** exceeded 95%.

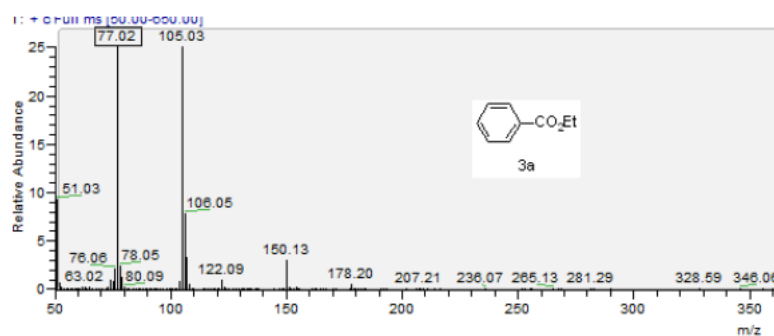

**Figure 7.** The GC-MS spectra of **3a**, FW of **3a** is 150.13.

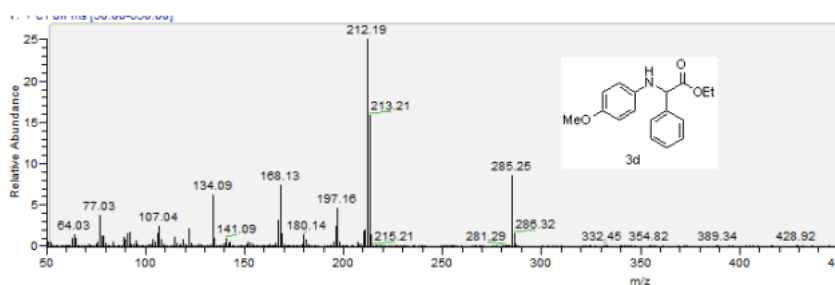

**Figure 8.** The GC-MS spectra of **3d**, The FW of **3d** is 286.32.

**Conclusion:** The above-mentioned GC-MS spectra indicated that ethyl 2-(4-methoxyphenylamino)-2-phenylacetate (**3d**) is a key intermediate which lead to the formation of ethyl benzoate (**3a**).

### 1.6.2 The electronic effect of substituents on the aryl boronic acids of cross-coupling ethoxycarbonylation of arylboronic acids with $\alpha$ -iminoesters

To the solution of **2aa** (0.18 mmol, 1 equiv), substituted phenylboronic acid (0.036 mmol, 0.2 equiv), Pd(TFA)<sub>2</sub> (0.009 mmol, 5 mol %) and bipy (0.009 mmol, 5 mol %) was added in 3.0 mL of CH<sub>3</sub>NO<sub>2</sub> under Ar, then the corresponding mixture was stirred at 110 °C for 48 h. After the reaction mixture was cooled to room temperature, then concentrated under vacuum and purified

by flash chromatography (eluting with eluent consisting of Hexane/EtOAc, 20:1) to give the pure product of **3g**.

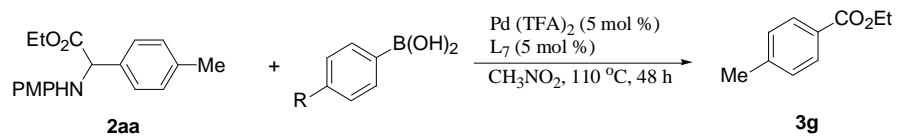

| Entry | R                 | Yield |
|-------|-------------------|-------|
| 1     | 4-CH <sub>3</sub> | 82%   |
| 2     | 4-H               | 85%   |
| 3     | 4-Cl              | 84%   |
| 4     | 4-CF <sub>3</sub> | 64%   |

## 2. $^1\text{H}$ NMR and $^{13}\text{C}$ NMR Spectrum for products

1)  $^1\text{H}$  NMR and  $^{13}\text{C}$  NMR Spectrum for ethyl benzoate **3a** (Using  $\text{CDCl}_3$  as solvent)

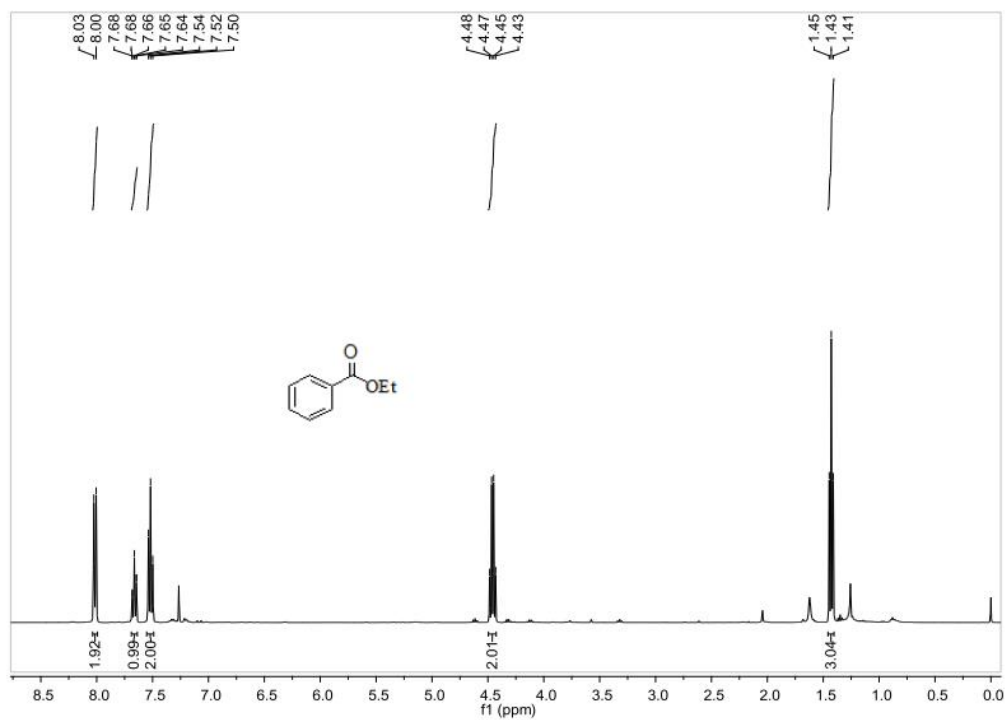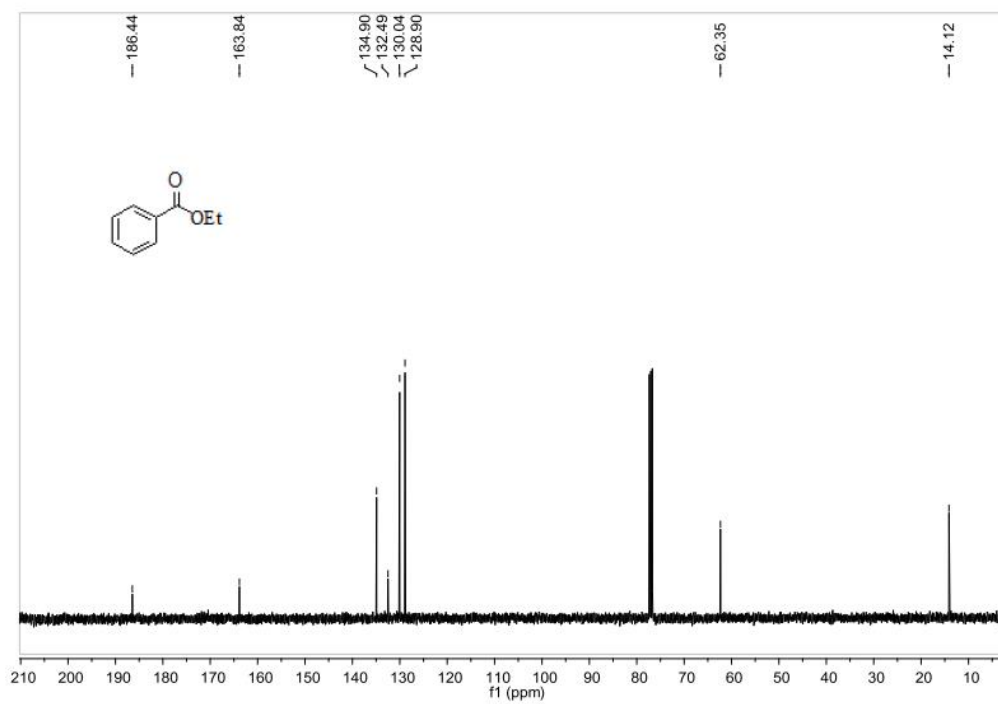



2)  $^1\text{H}$  NMR and  $^{13}\text{C}$  NMR Spectrum for isopropyl benzoate **3b** (Using  $\text{CDCl}_3$  as solvent)

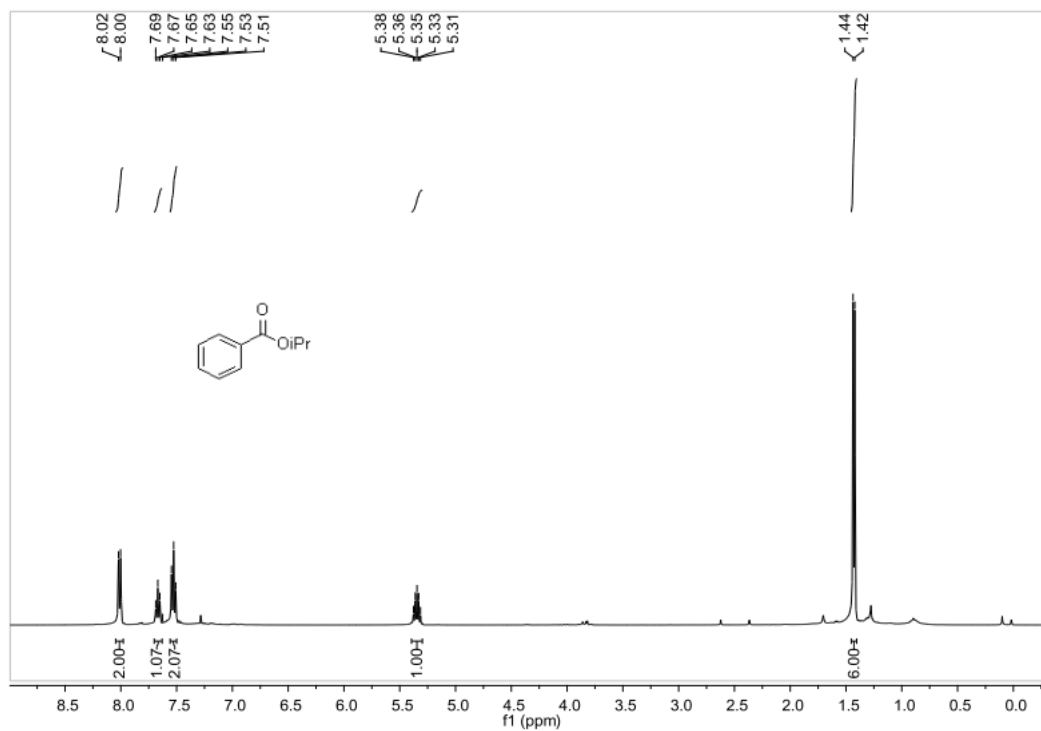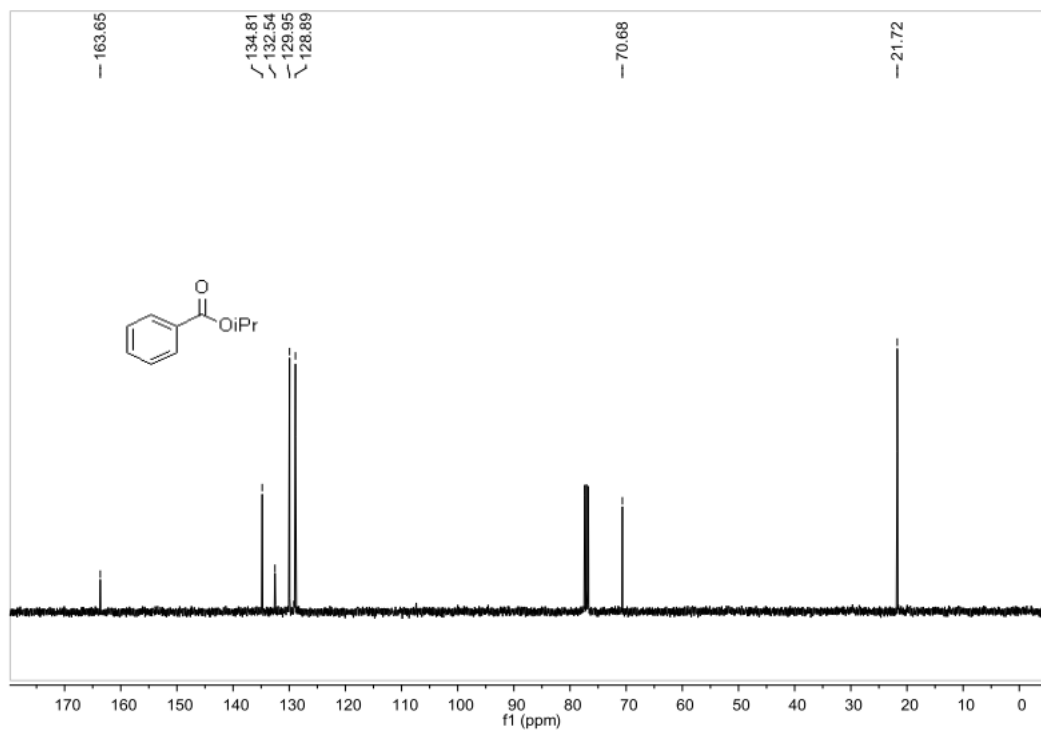

3)  $^1\text{H}$  NMR and  $^{13}\text{C}$  NMR Spectrum for benzyl benzoate **3c** (Using  $\text{CDCl}_3$  as solvent)

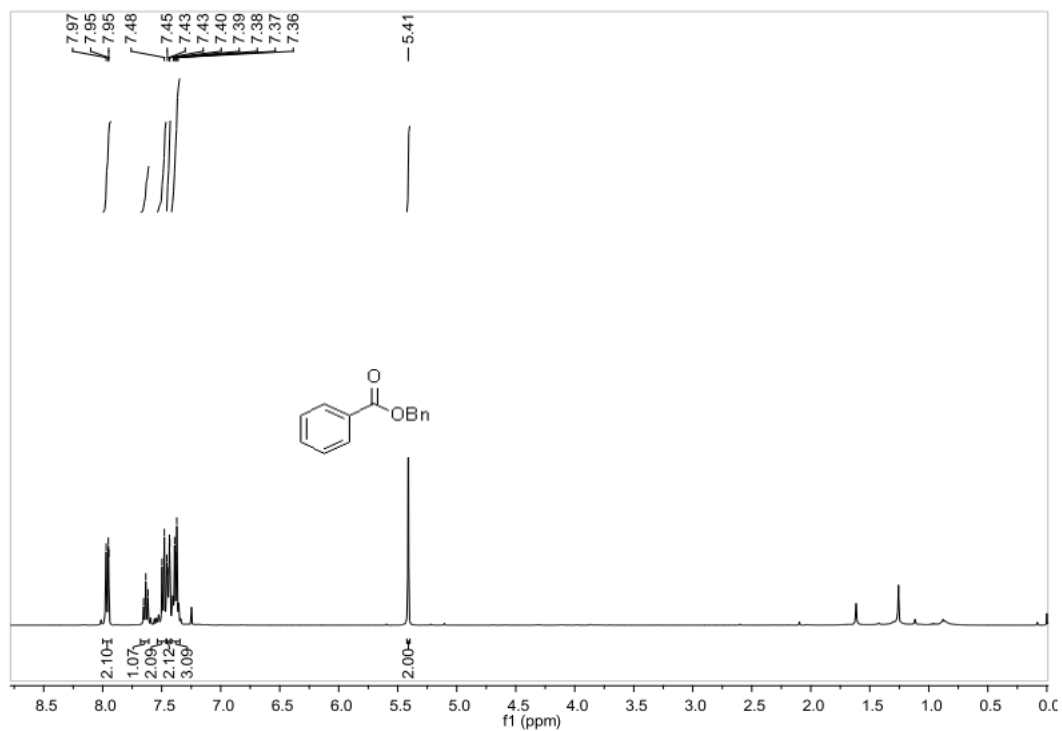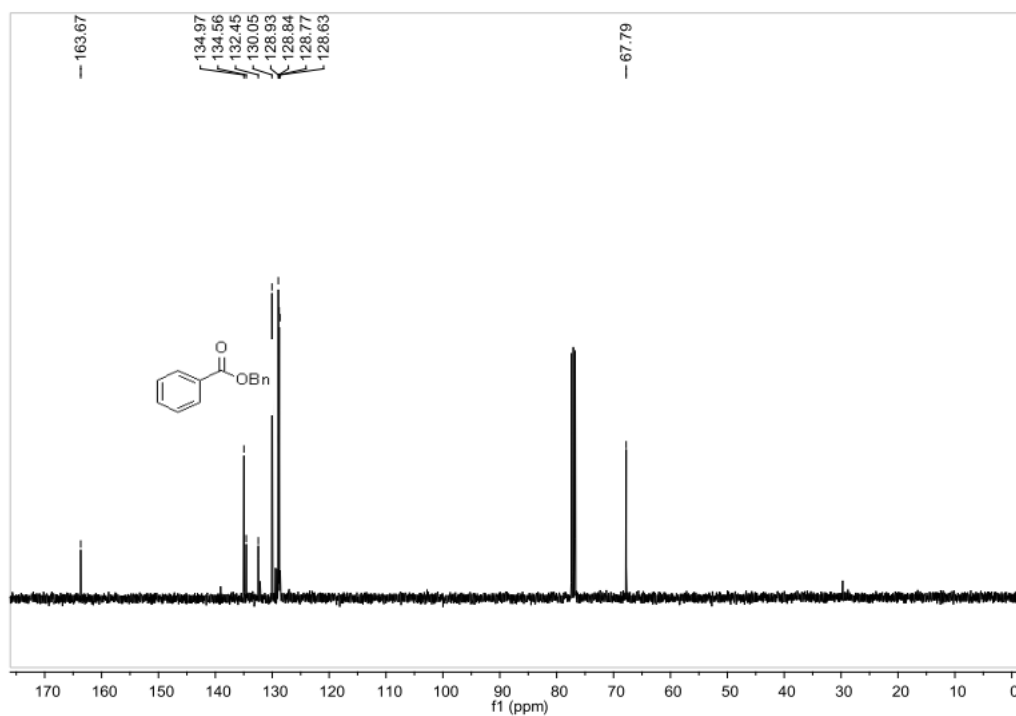

4).  $^1\text{H}$  NMR and  $^{13}\text{C}$  NMR Spectrum for ethyl 2-((4-methoxyphenyl) amino)-2-(*p*-tolyl) acetate  
**P2a** (Using  $\text{CDCl}_3$  as solvent)

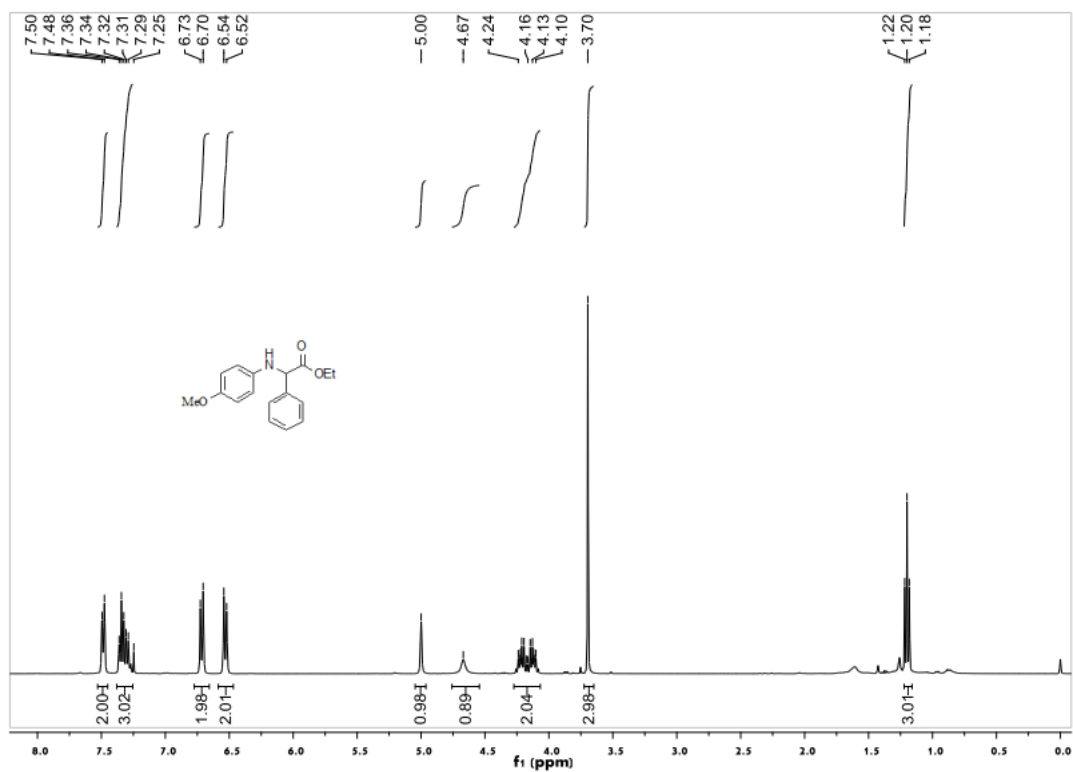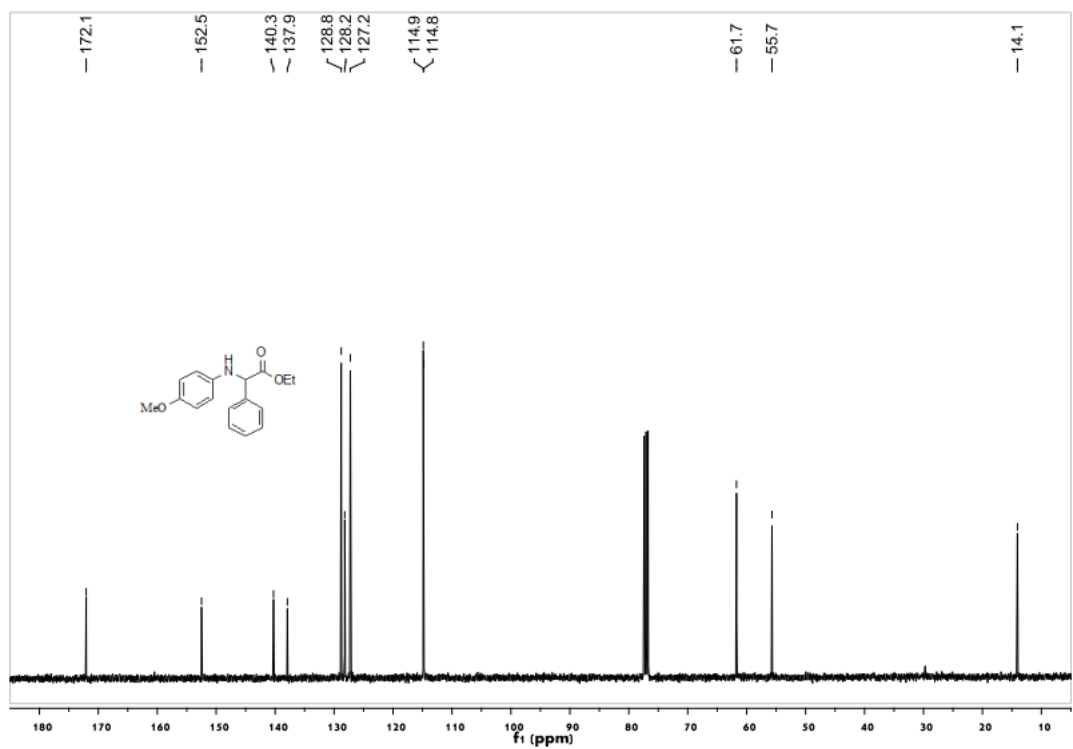

5).  $^1\text{H}$  NMR and  $^{13}\text{C}$  NMR Spectrum for benzil **3a-1** (Using  $\text{CDCl}_3$  as solvent)

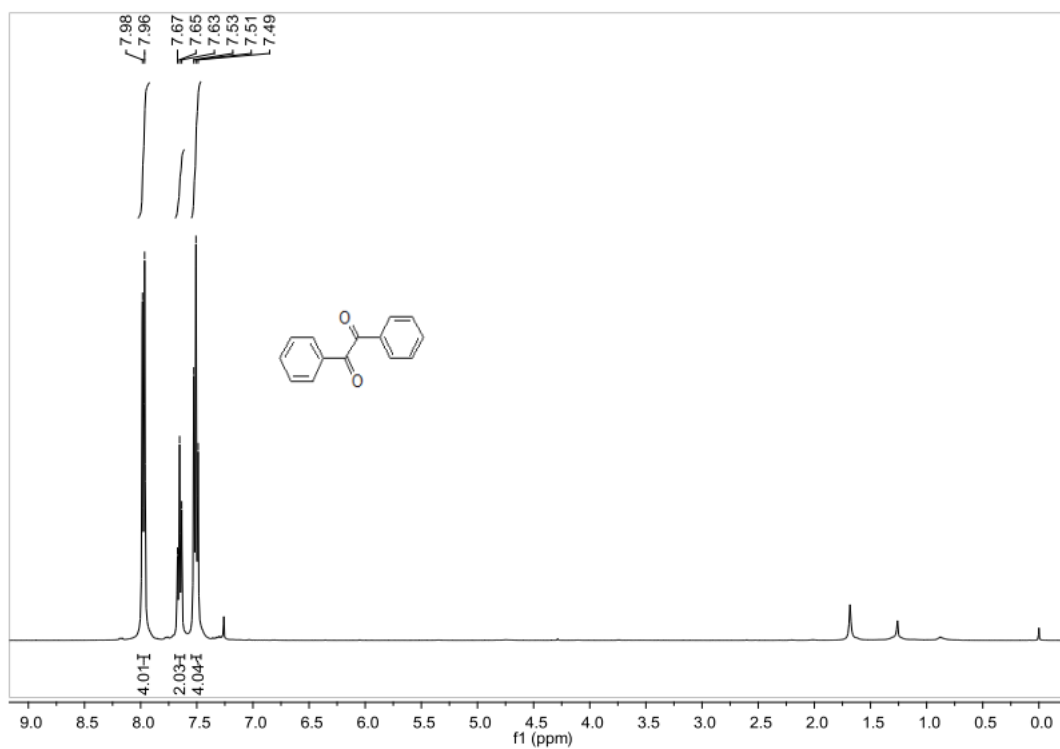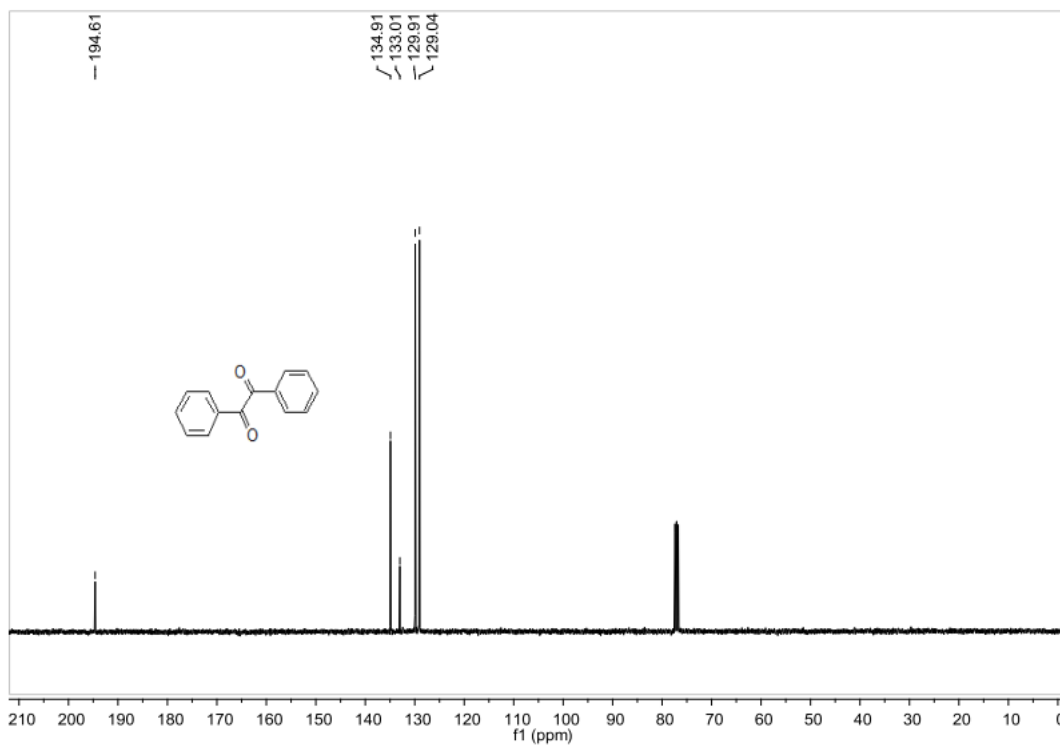

6)  $^1\text{H}$  NMR and  $^{13}\text{C}$  NMR Spectrum for 4-methoxybenzoate **3d** (Using  $\text{CDCl}_3$  as solvent)

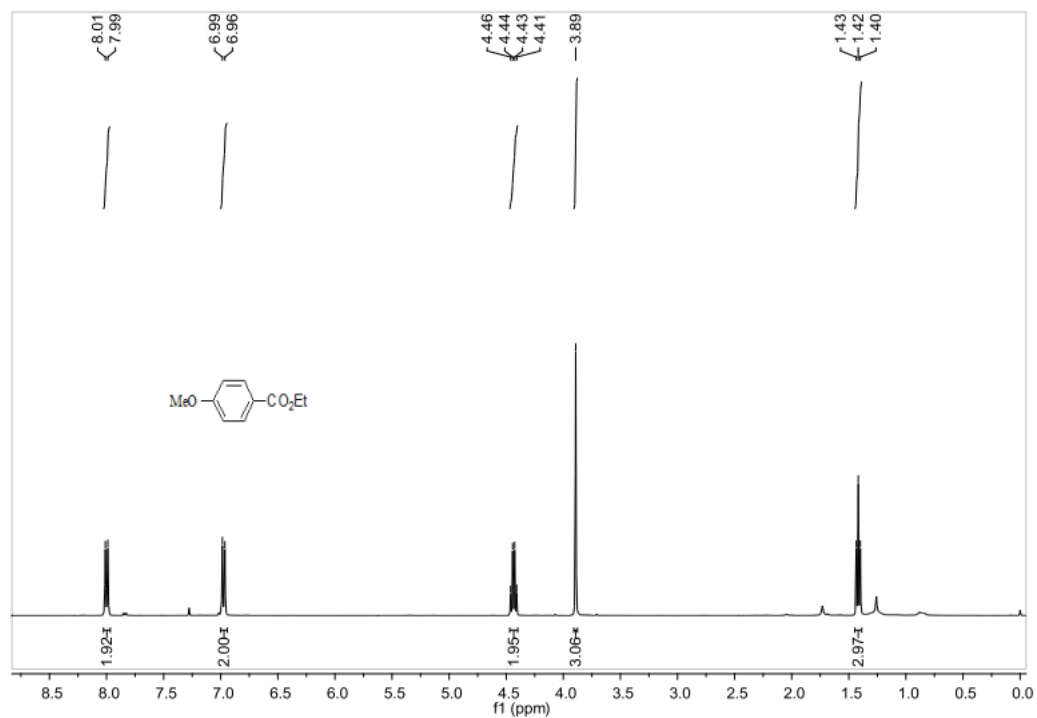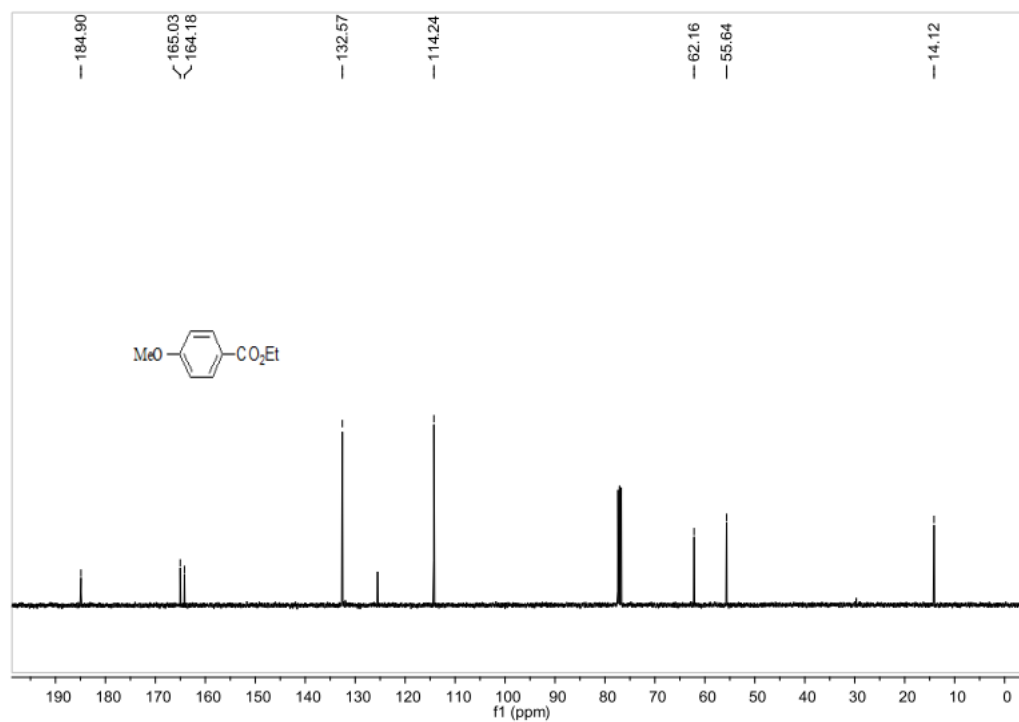

7)  $^1\text{H}$  NMR and  $^{13}\text{C}$  NMR Spectrum for ethyl 3-methoxybenzoate **3e** (Using  $\text{CDCl}_3$  as solvent)

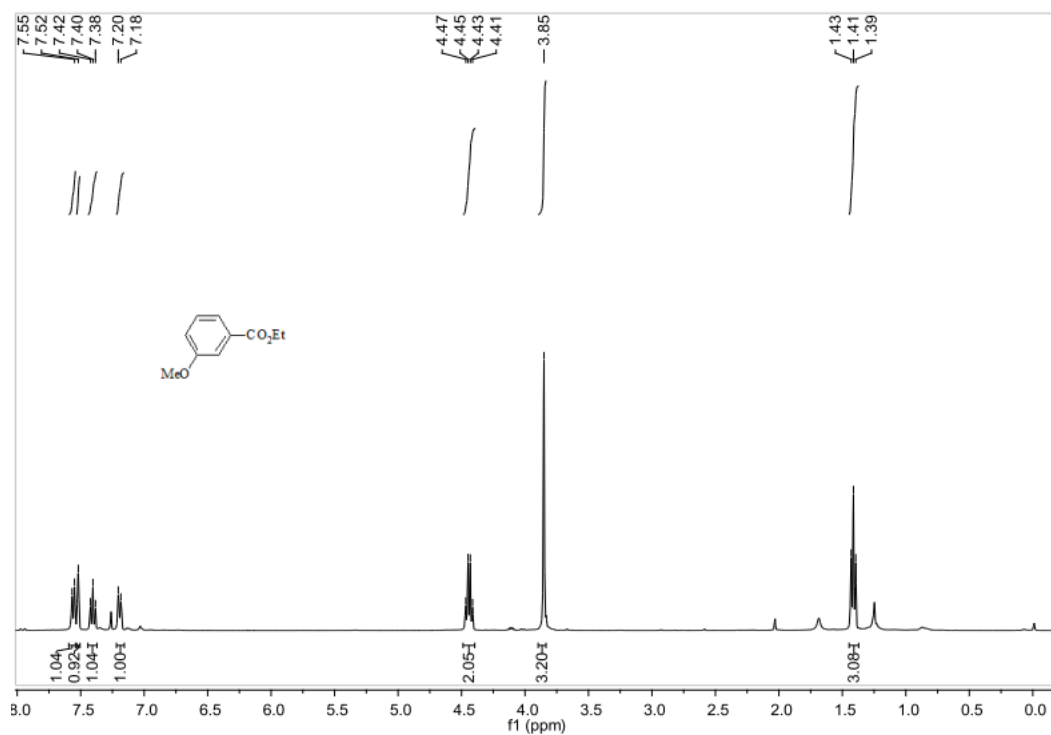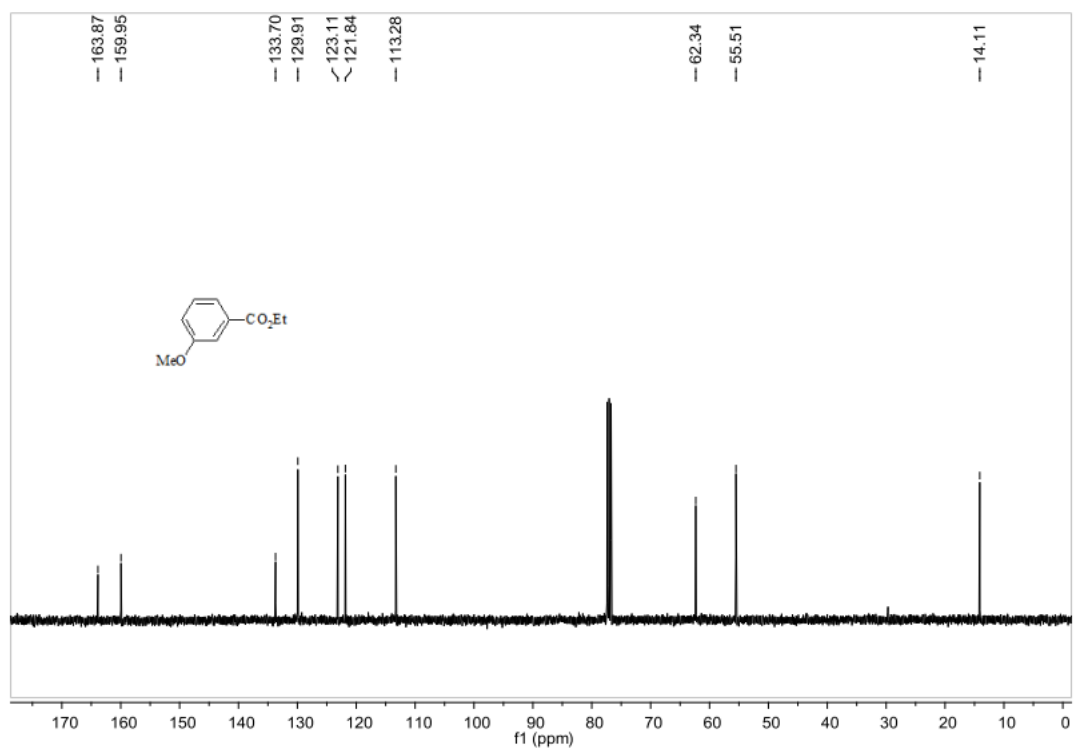

8).  $^1\text{H}$  NMR and  $^{13}\text{C}$  NMR Spectrum for ethyl 2-methoxybenzoate **3f** (Using  $\text{CDCl}_3$  as solvent)

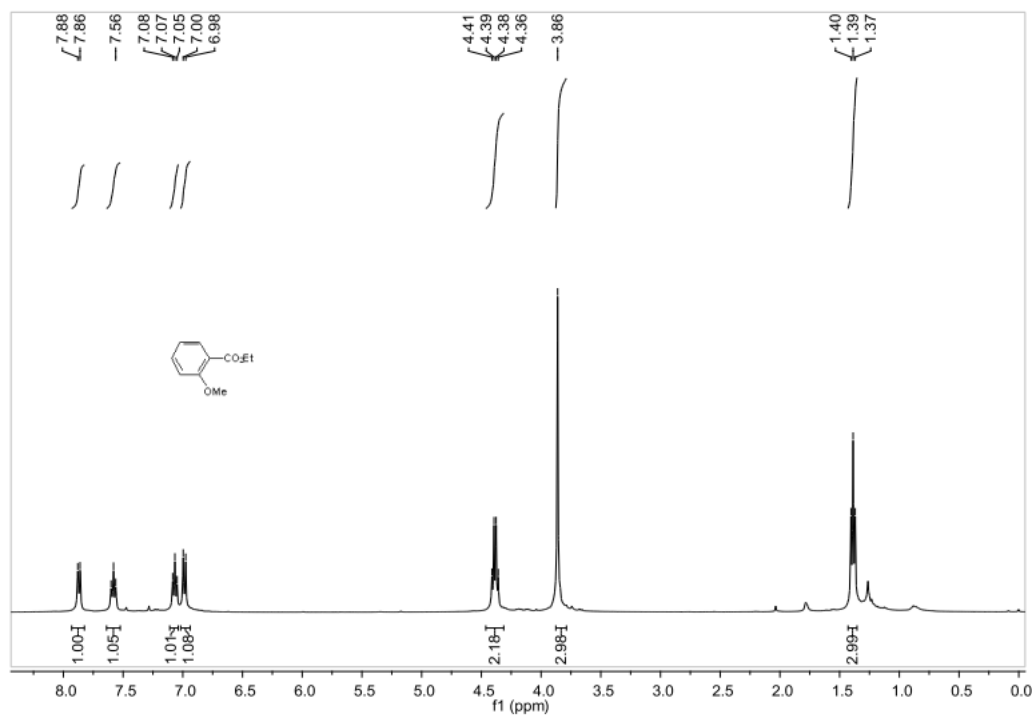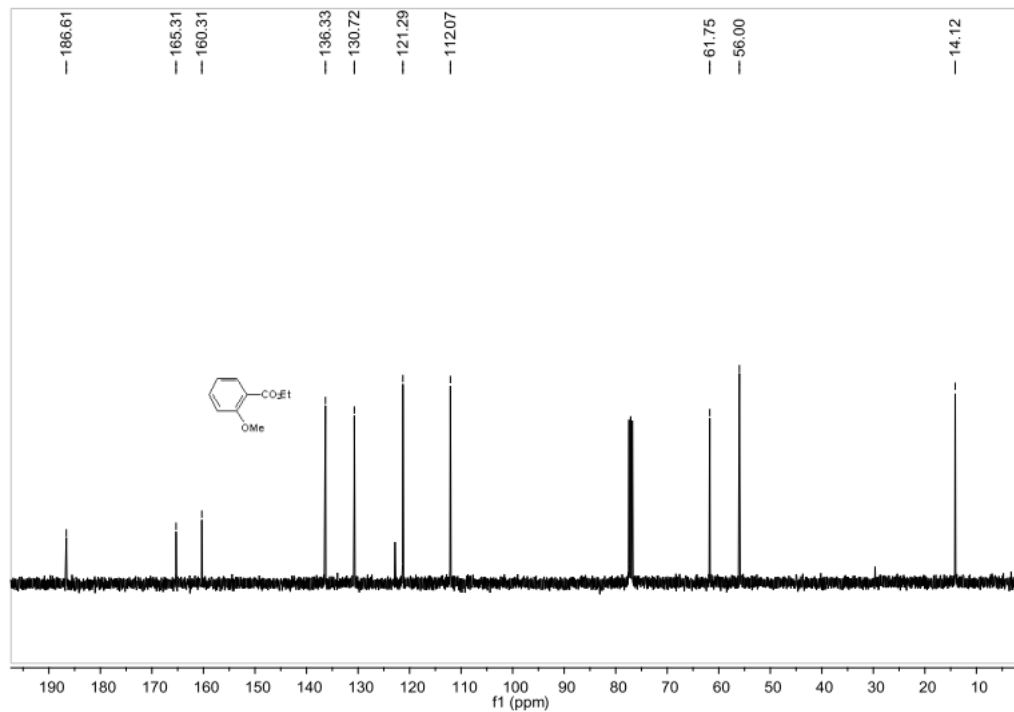

9).  $^1\text{H}$  NMR and  $^{13}\text{C}$  NMR Spectrum for ethyl 4-methylbenzoate **3g** (Using  $\text{CDCl}_3$  as solvent)

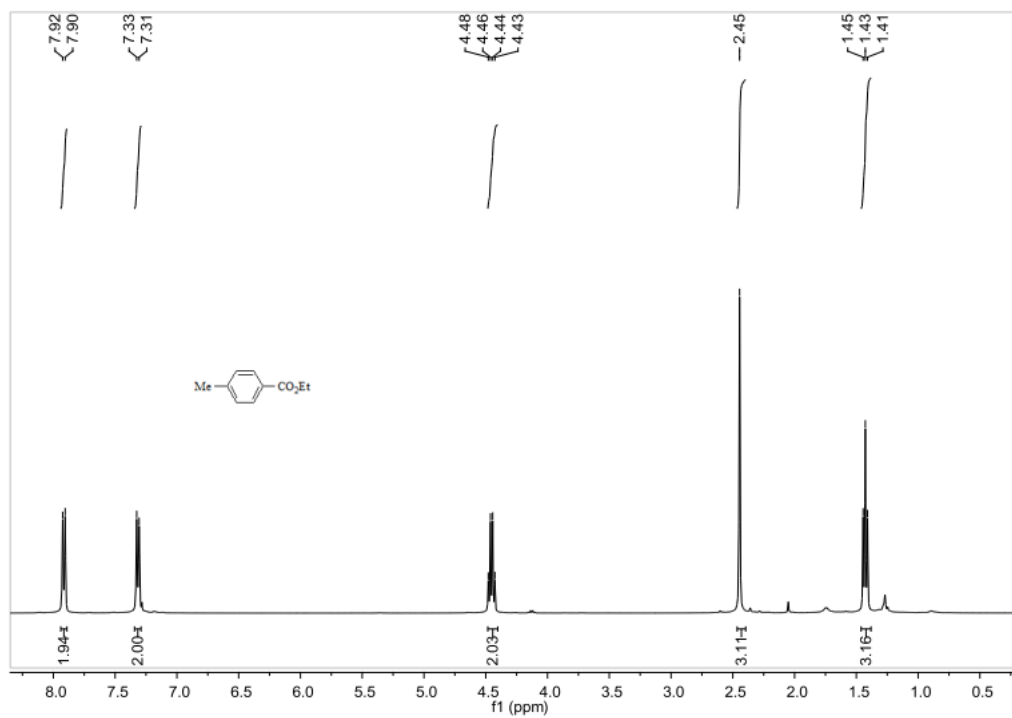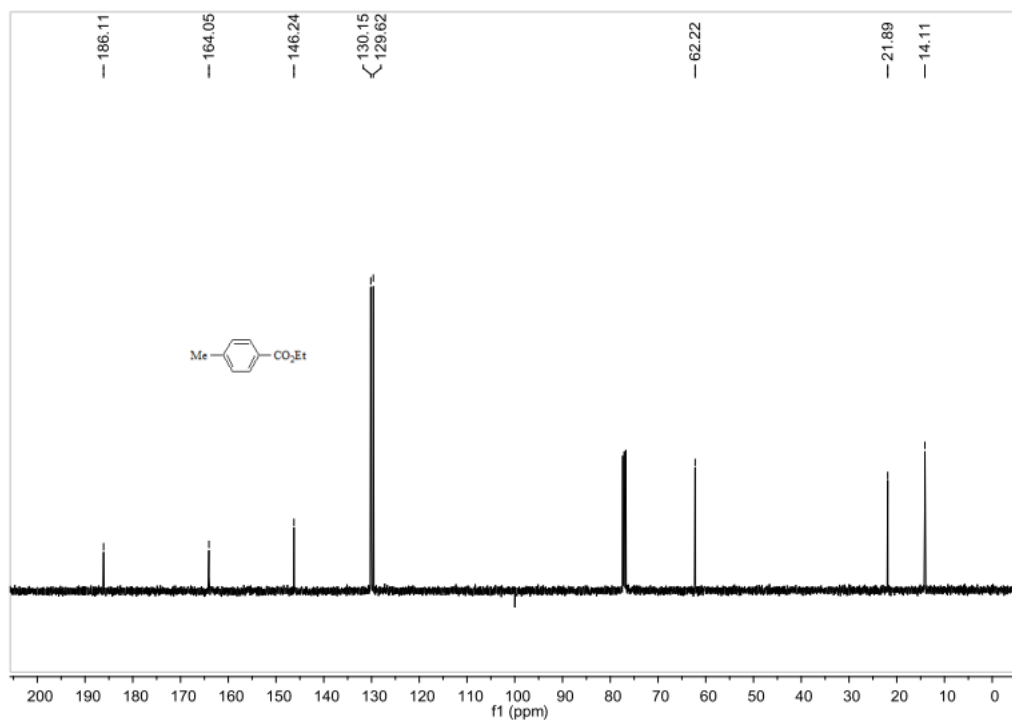



10).  $^1\text{H}$  NMR and  $^{13}\text{C}$  NMR Spectrum for ethyl 3-methylbenzoate **3h** (Using  $\text{CDCl}_3$  as solvent)

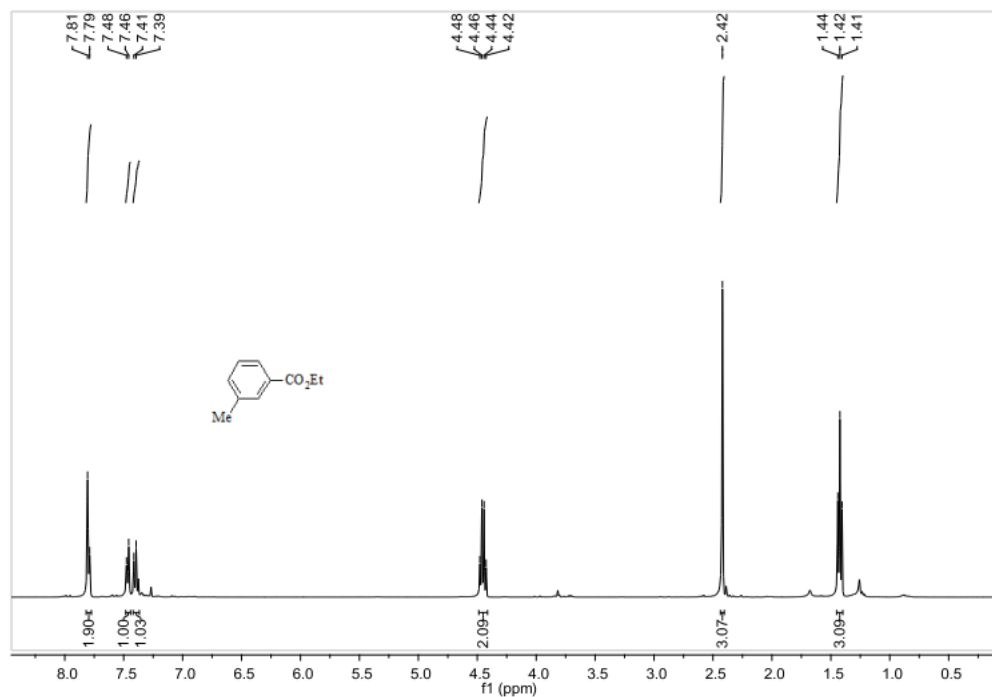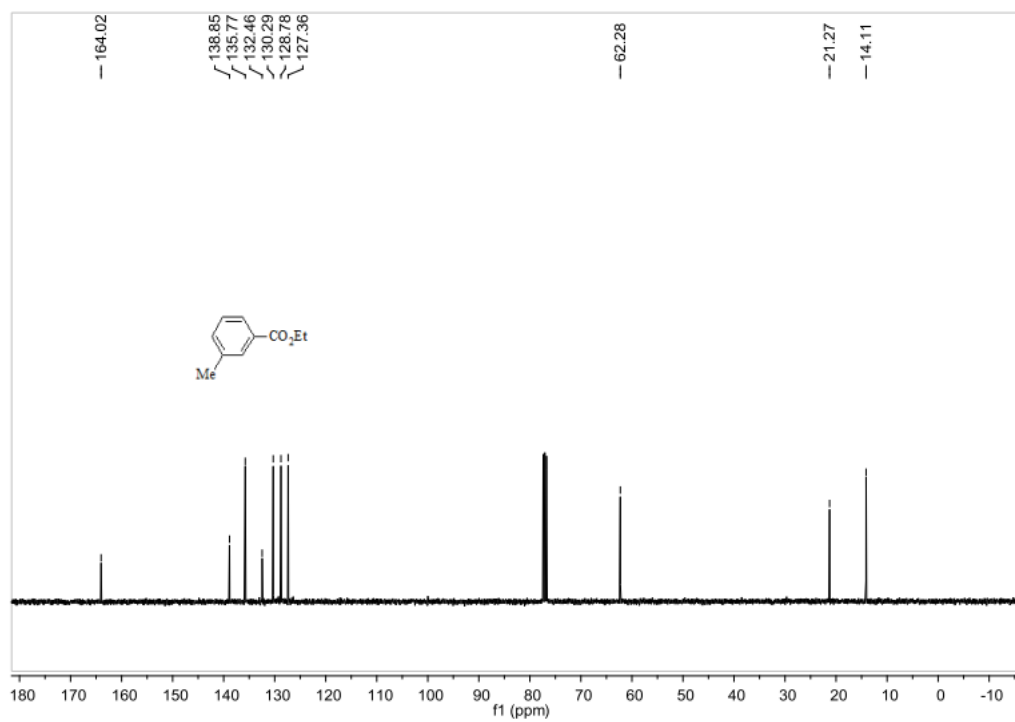

11).  $^1\text{H}$  NMR and  $^{13}\text{C}$  NMR Spectrum for ethyl 4-(trifluoromethyl) benzoate **3i** (Using  $\text{CDCl}_3$  as solvent)

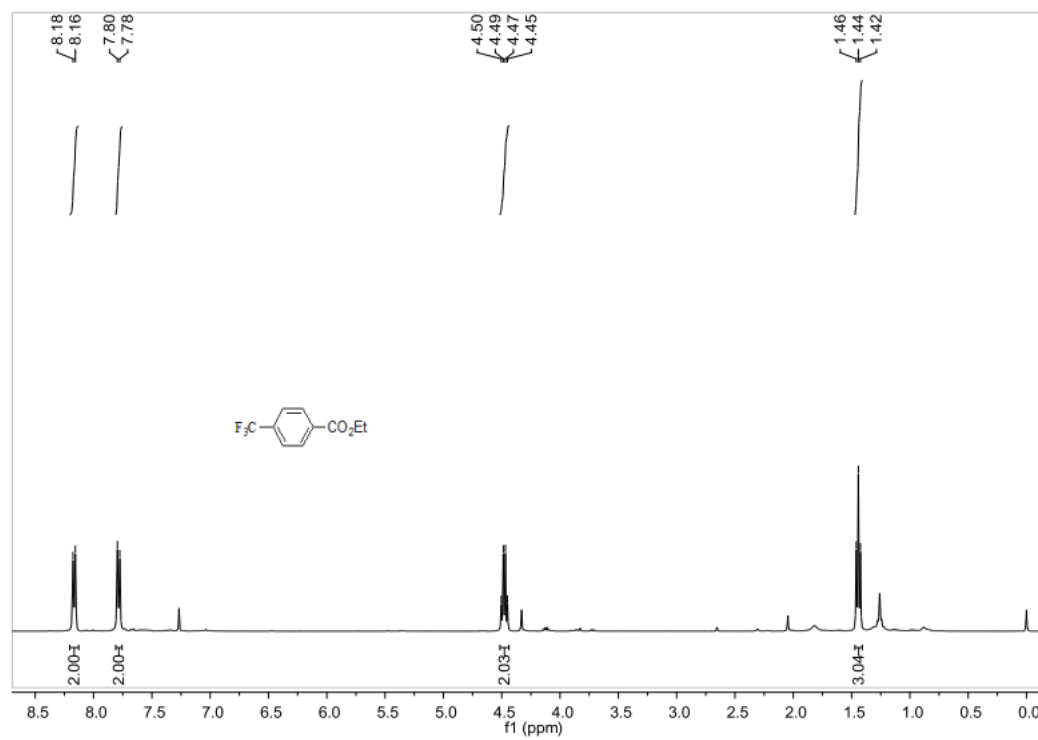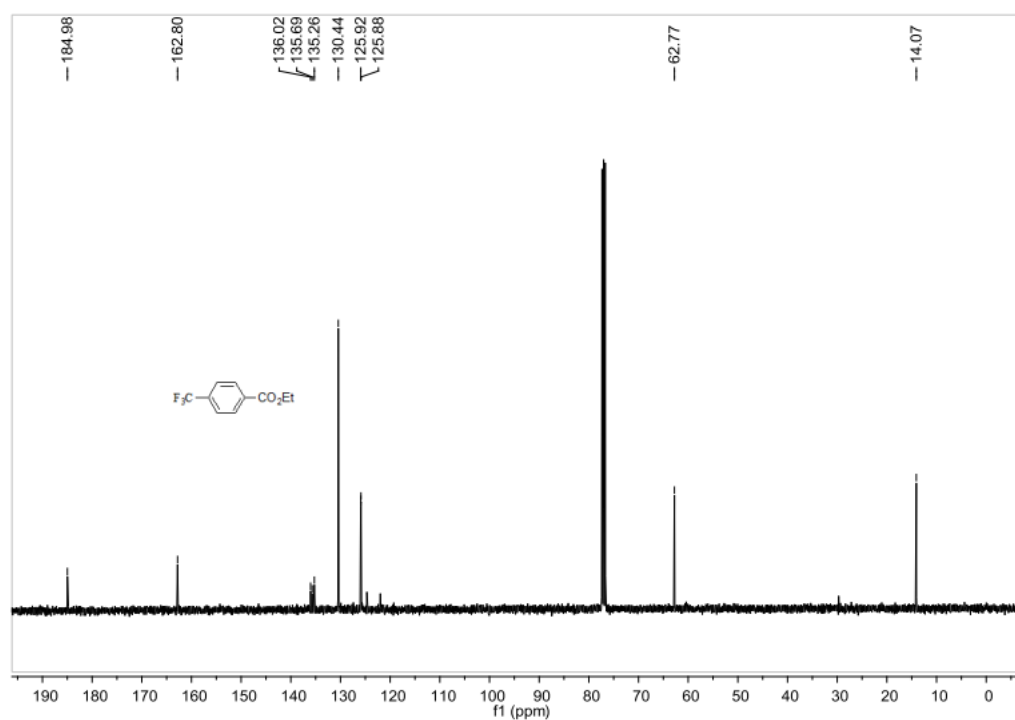

12).  $^1\text{H}$  NMR and  $^{13}\text{C}$  NMR Spectrum for ethyl 3-nitrobenzoate **3j** (Using  $\text{CDCl}_3$  as solvent)

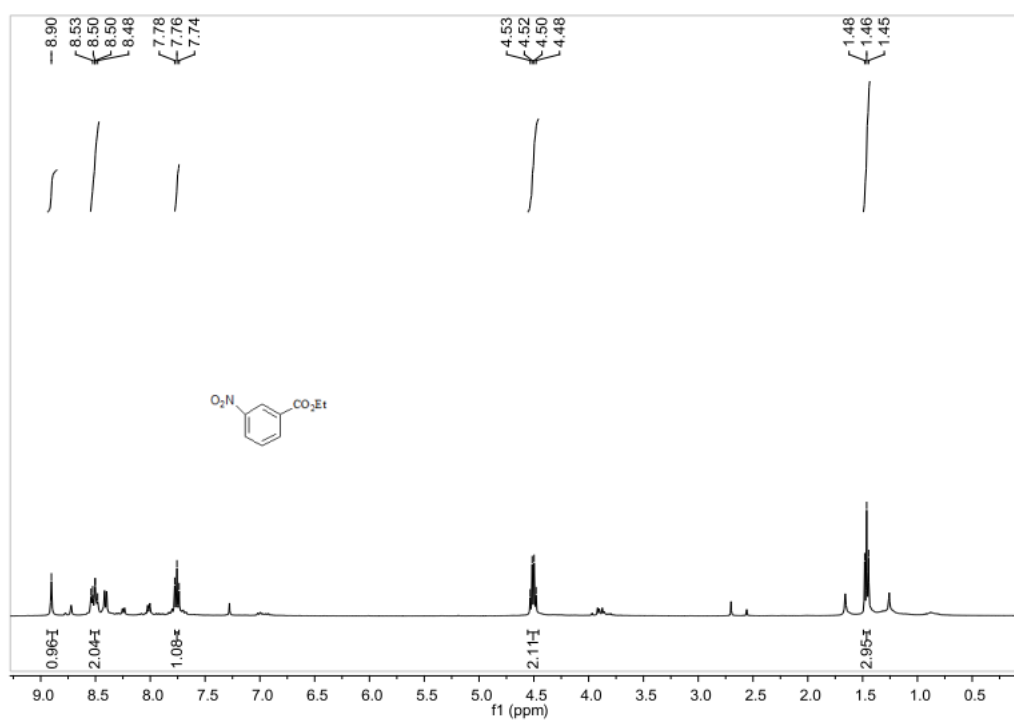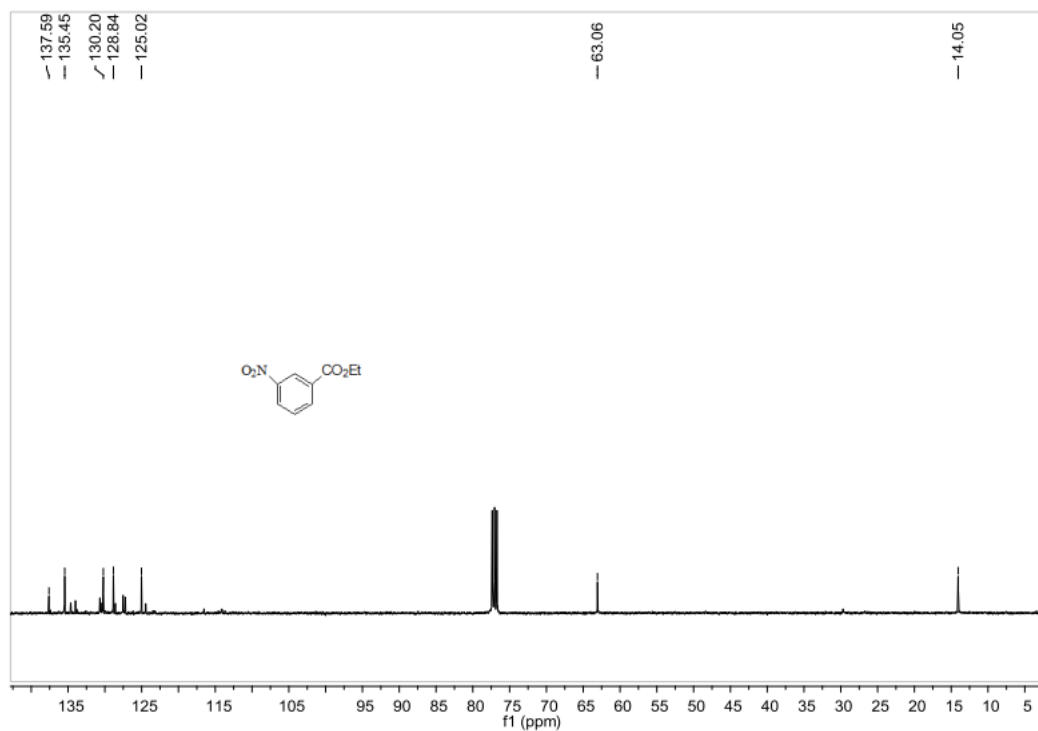

13).  $^1\text{H}$  NMR and  $^{13}\text{C}$  NMR Spectrum for 4'-methoxy-3-nitro-1,1'-biphenyl **3j-1** (Using  $\text{CDCl}_3$  as solvent)

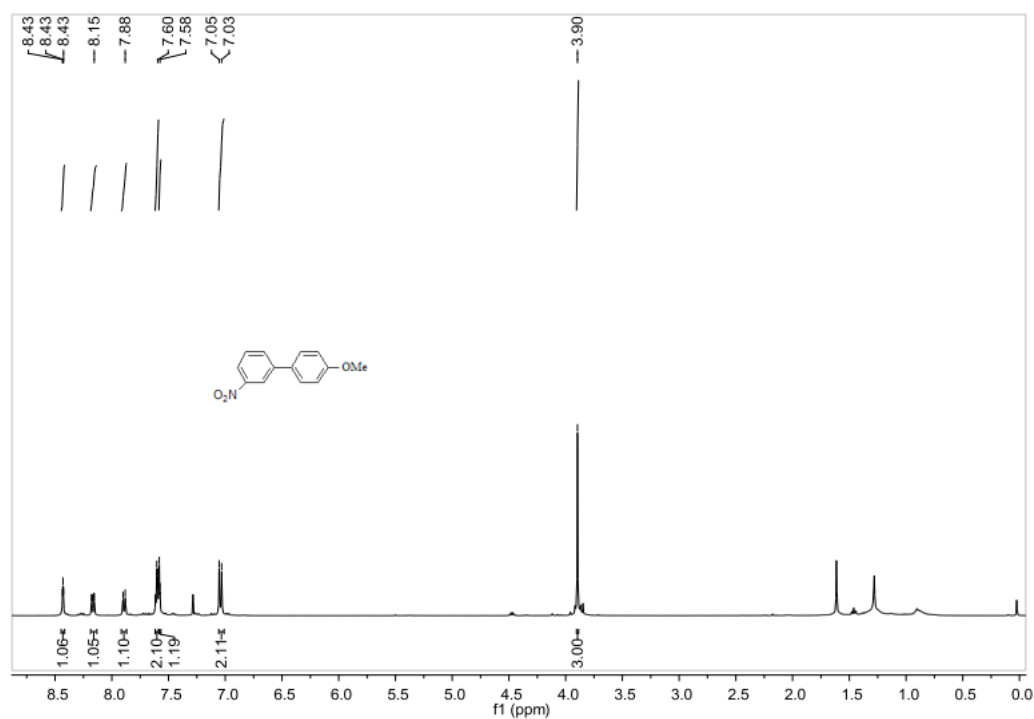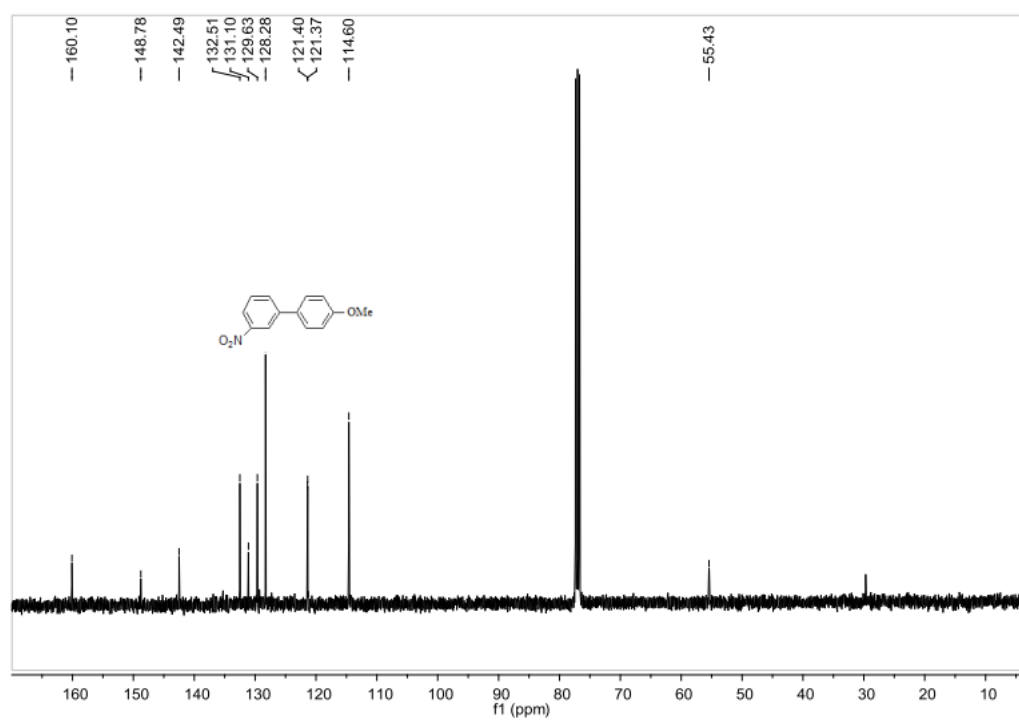

14).  $^1\text{H}$  NMR and  $^{13}\text{C}$  NMR Spectrum for ethyl 4-chlorobenzoate **3k** (Using  $\text{CDCl}_3$  as solvent)

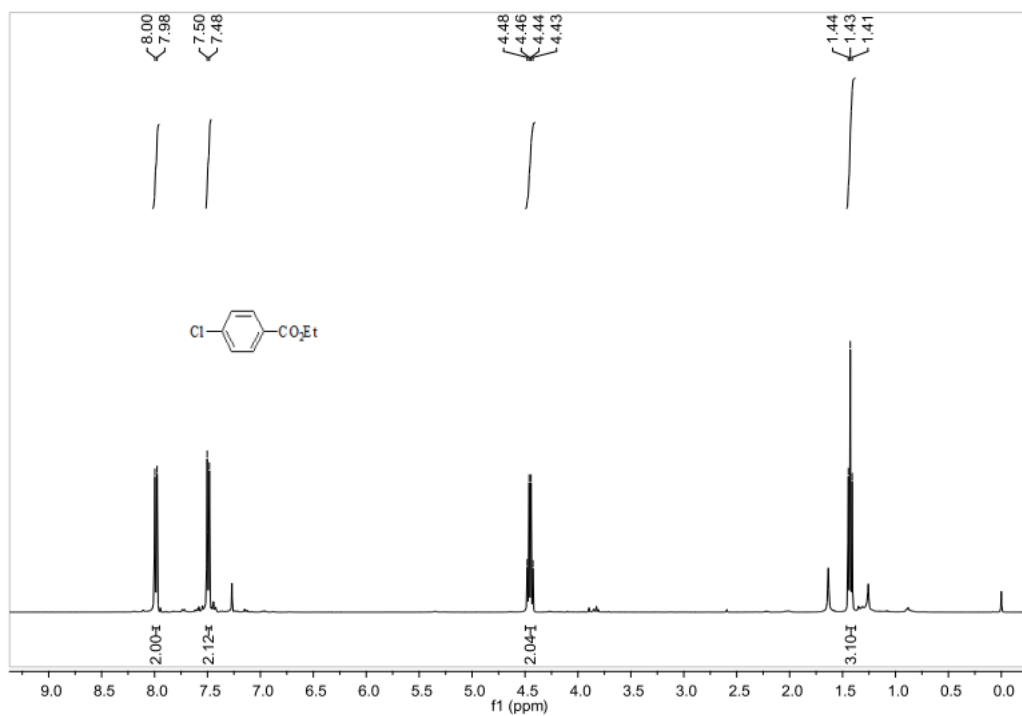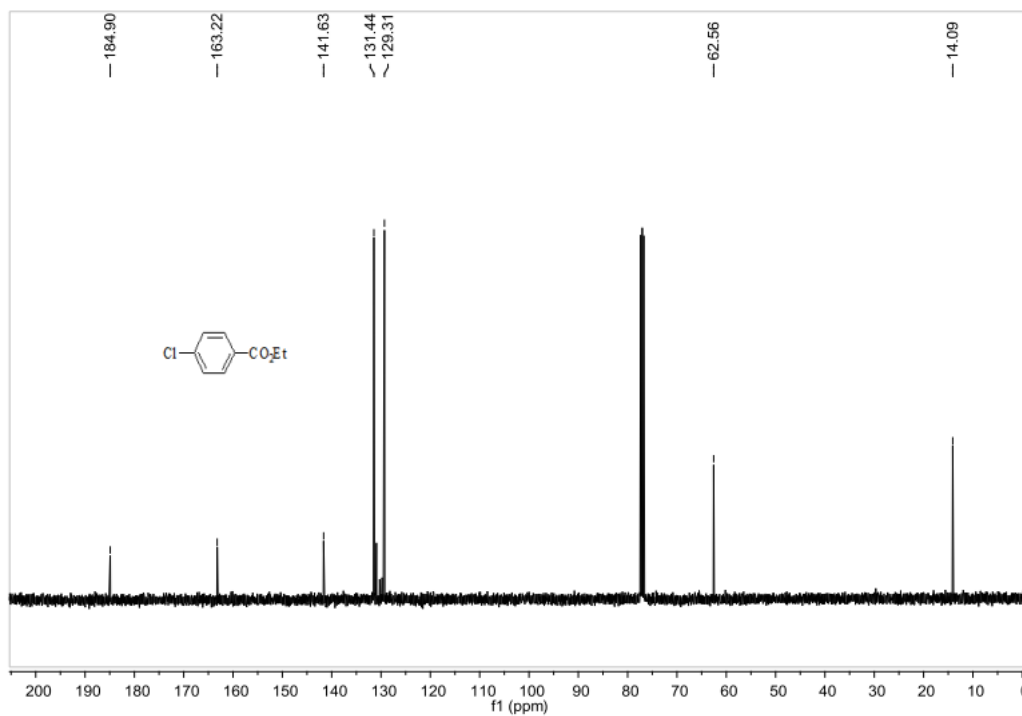

15).  $^1\text{H}$  NMR and  $^{13}\text{C}$  NMR Spectrum for ethyl 3-chlorobenzoate **3I** (Using  $\text{CDCl}_3$  as solvent)

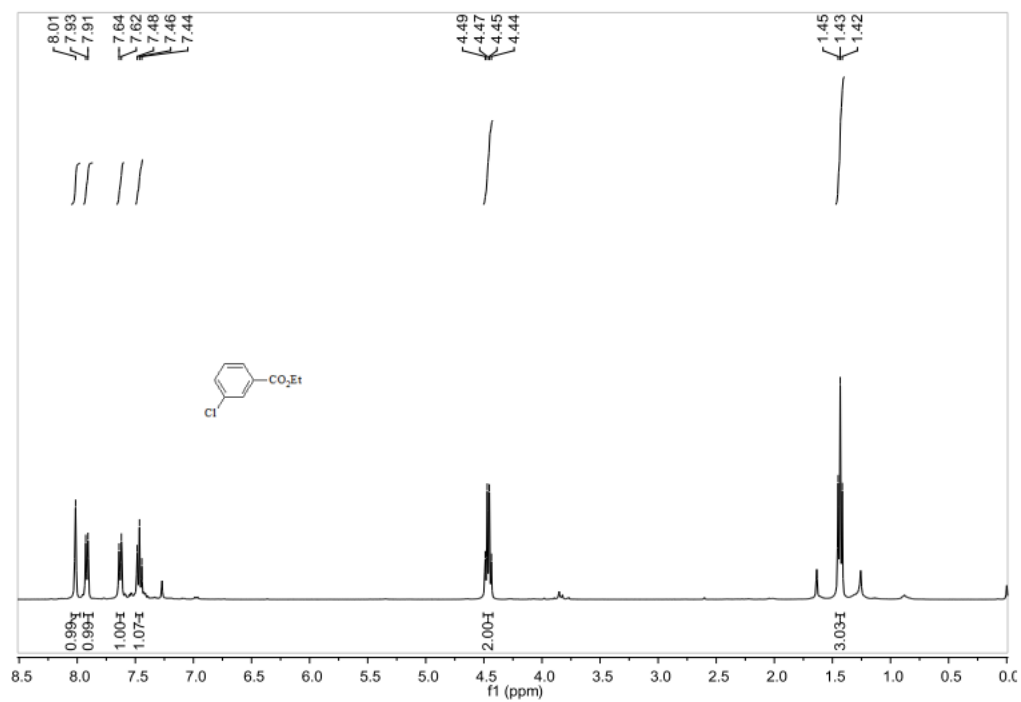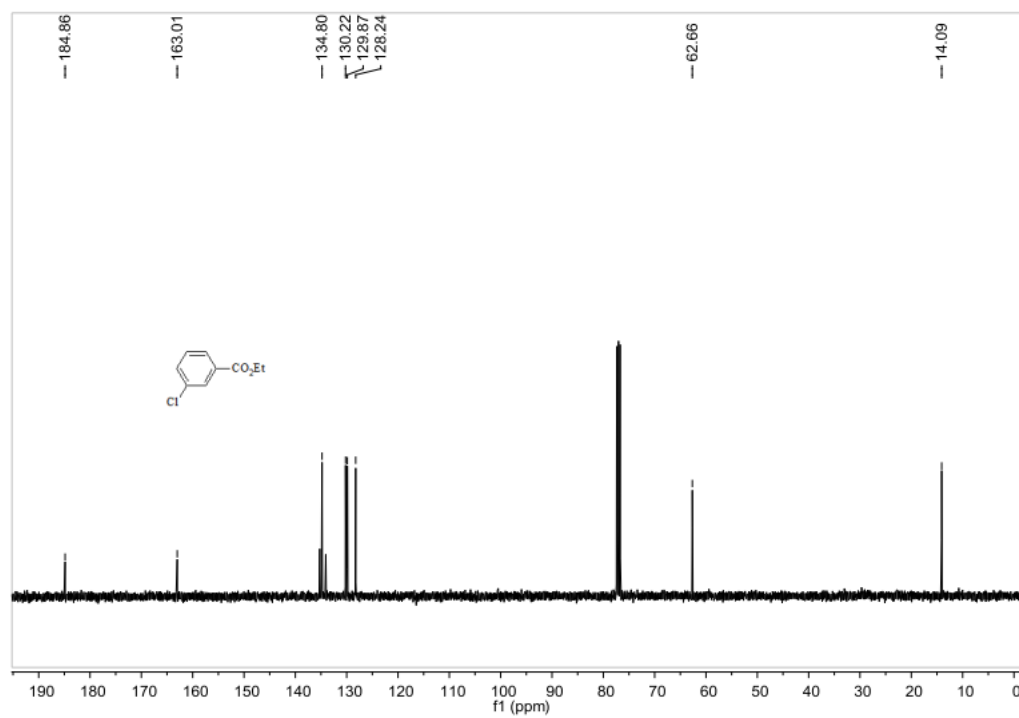

16).  $^1\text{H}$  NMR and  $^{13}\text{C}$  NMR Spectrum for ethyl 4-fluorobenzoate **3m** (Using  $\text{CDCl}_3$  as solvent)

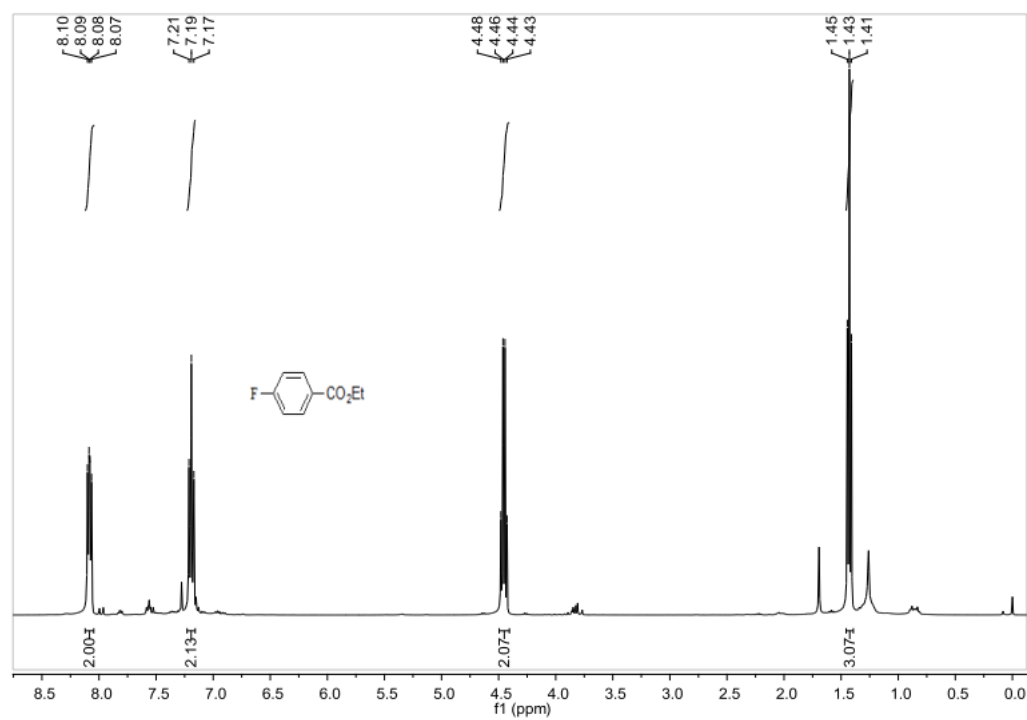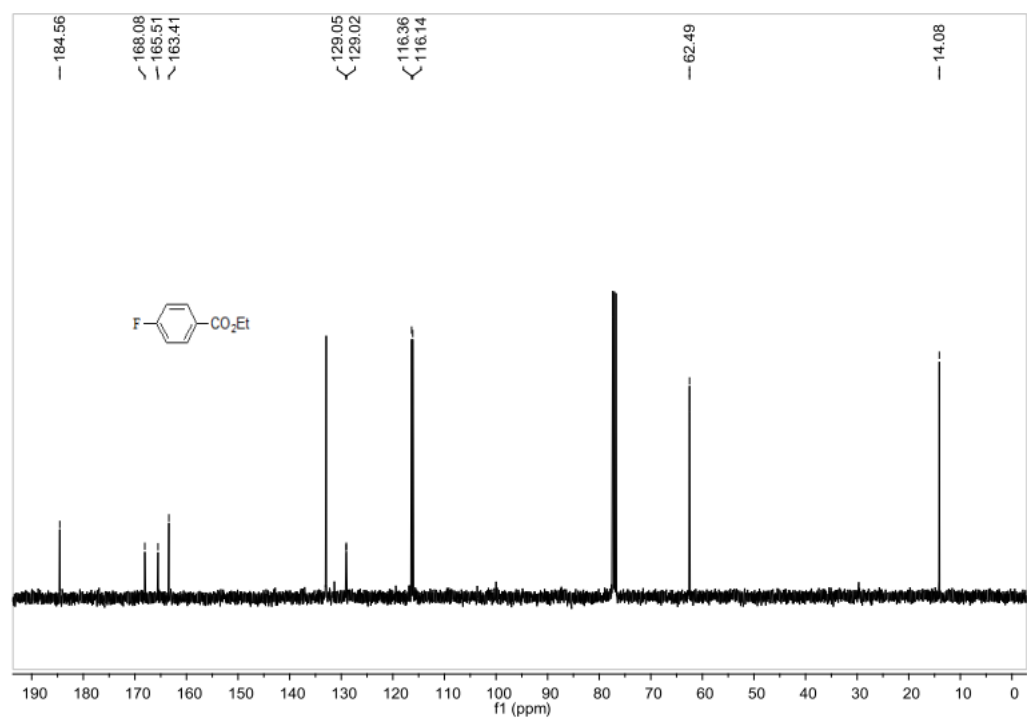

17).  $^1\text{H}$  NMR and  $^{13}\text{C}$  NMR Spectrum for ethyl [1,1'-biphenyl]-4-carboxylate **3n** (Using  $\text{CDCl}_3$  as solvent)

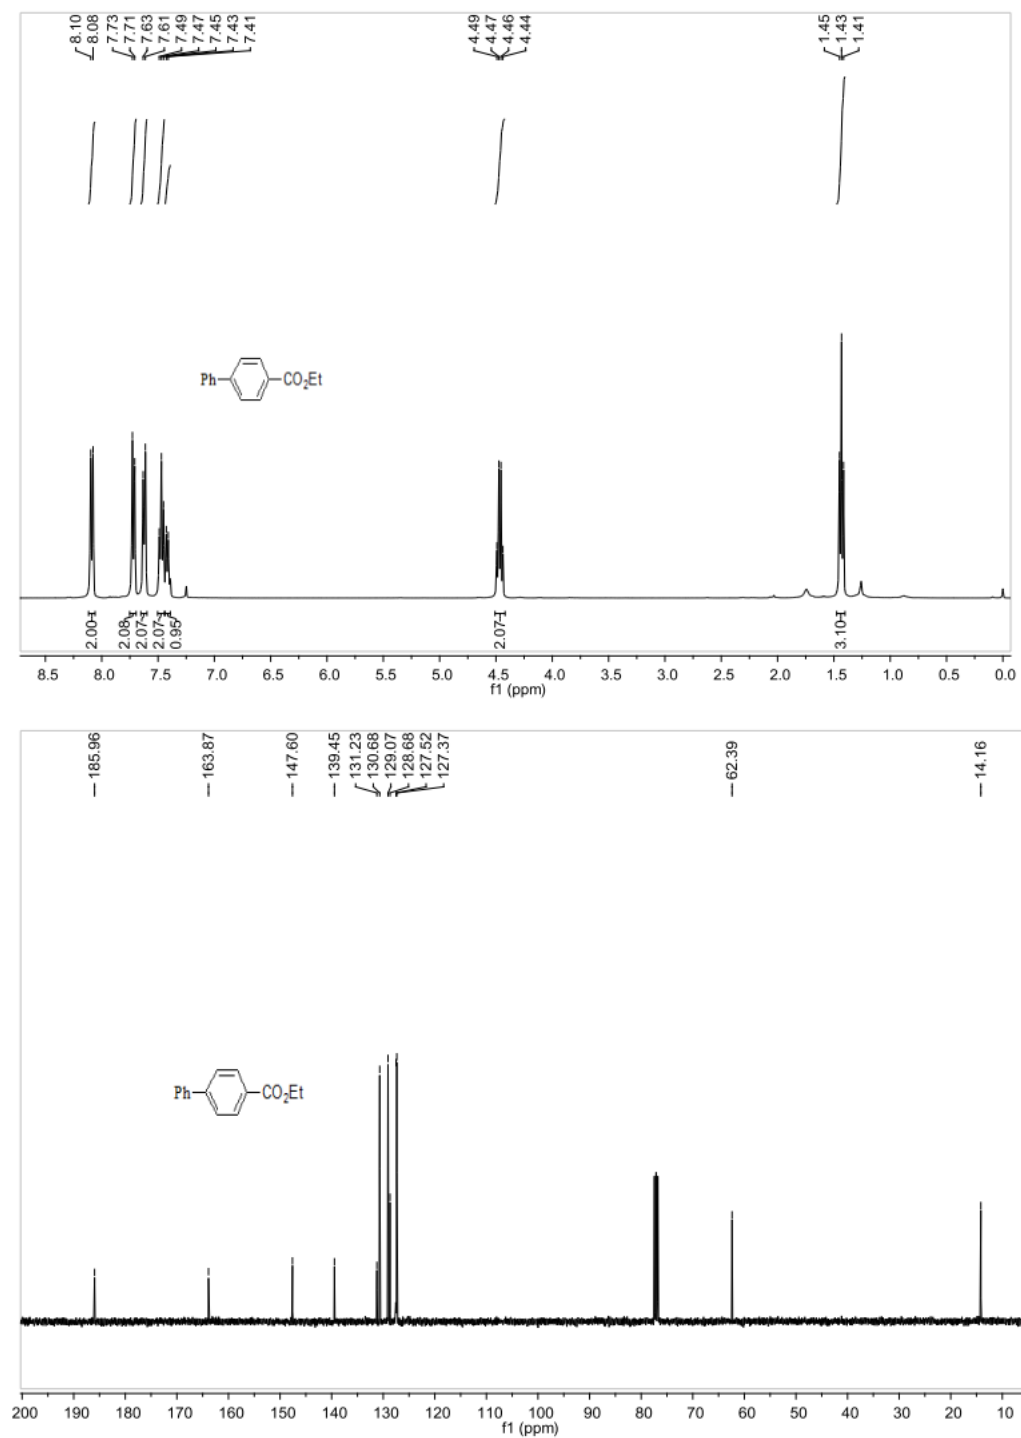



18)  $^1\text{H}$  NMR and  $^{13}\text{C}$  NMR Spectrum for ethyl 1-naphthoate **3o** (Using  $\text{CDCl}_3$  as solvent)

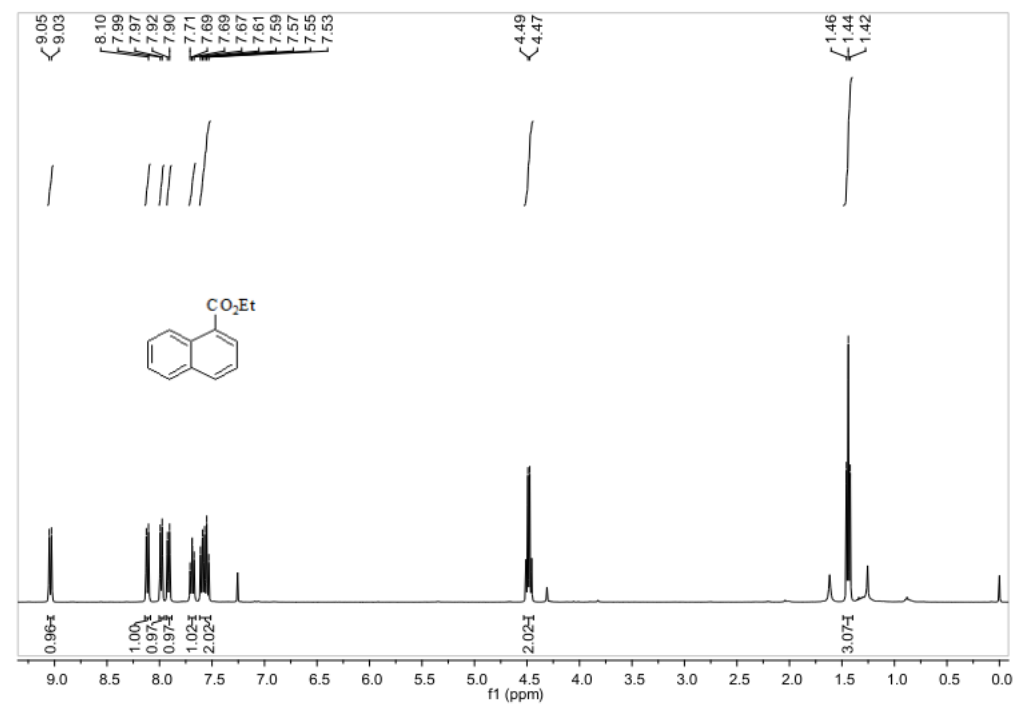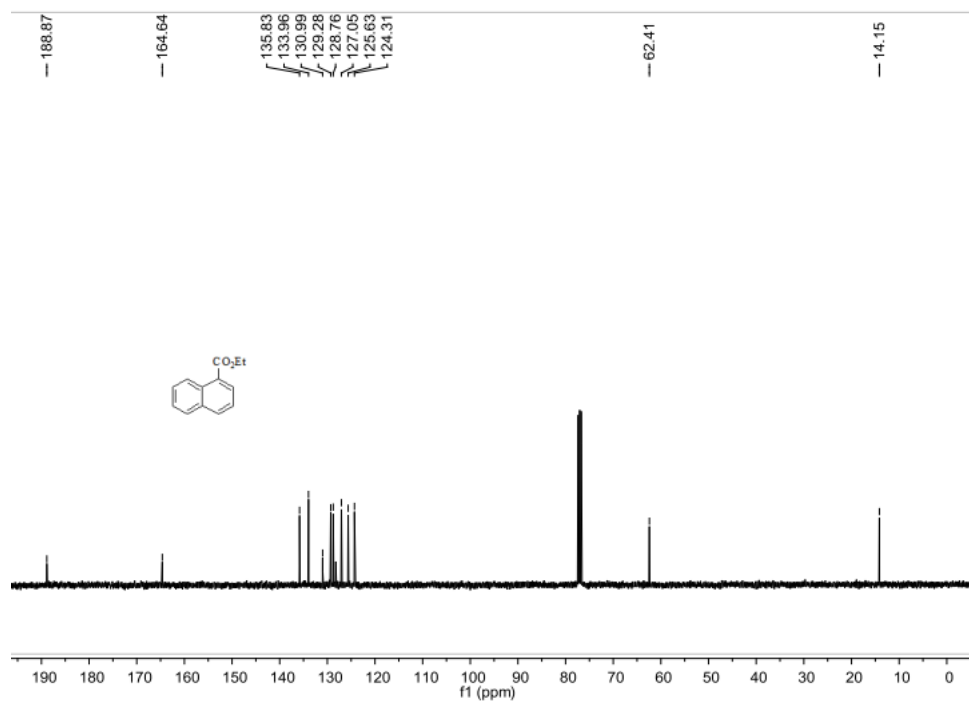

19).  $^1\text{H}$  NMR and  $^{13}\text{C}$  NMR Spectrum for ethyl phenanthrene-9-carboxylate **3p** (Using  $\text{CDCl}_3$  as solvent)

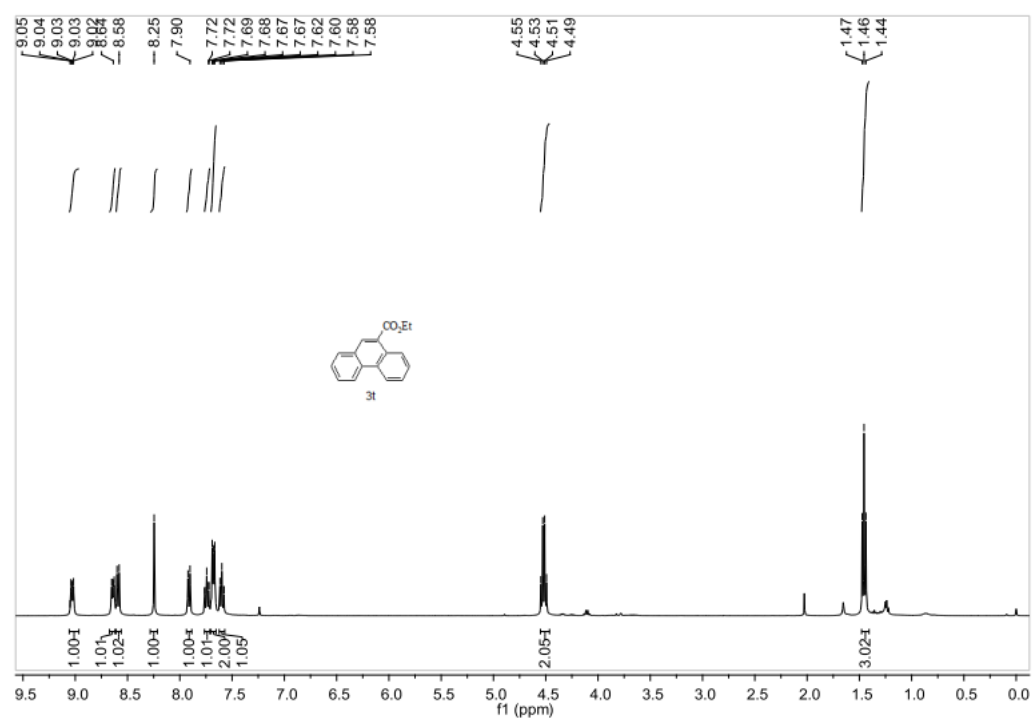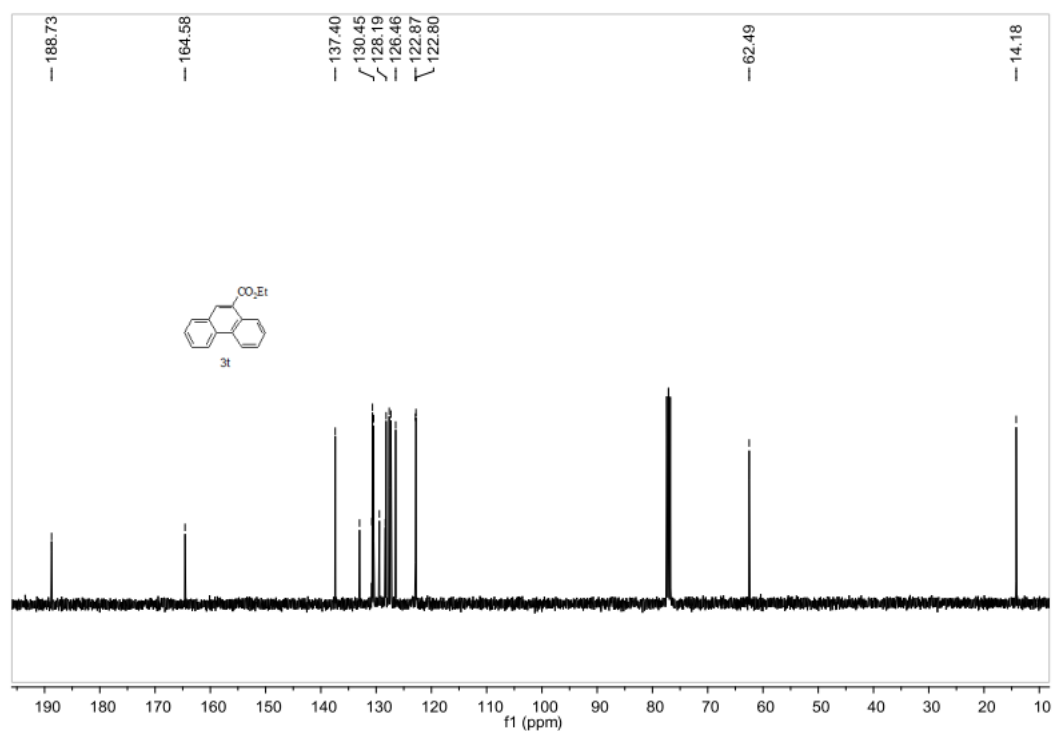

20)  $^1\text{H}$  NMR and  $^{13}\text{C}$  NMR Spectrum for ethyl 4-(benzyloxy)-3-fluorobenzoate **3q** (Using  $\text{CDCl}_3$  as solvent)

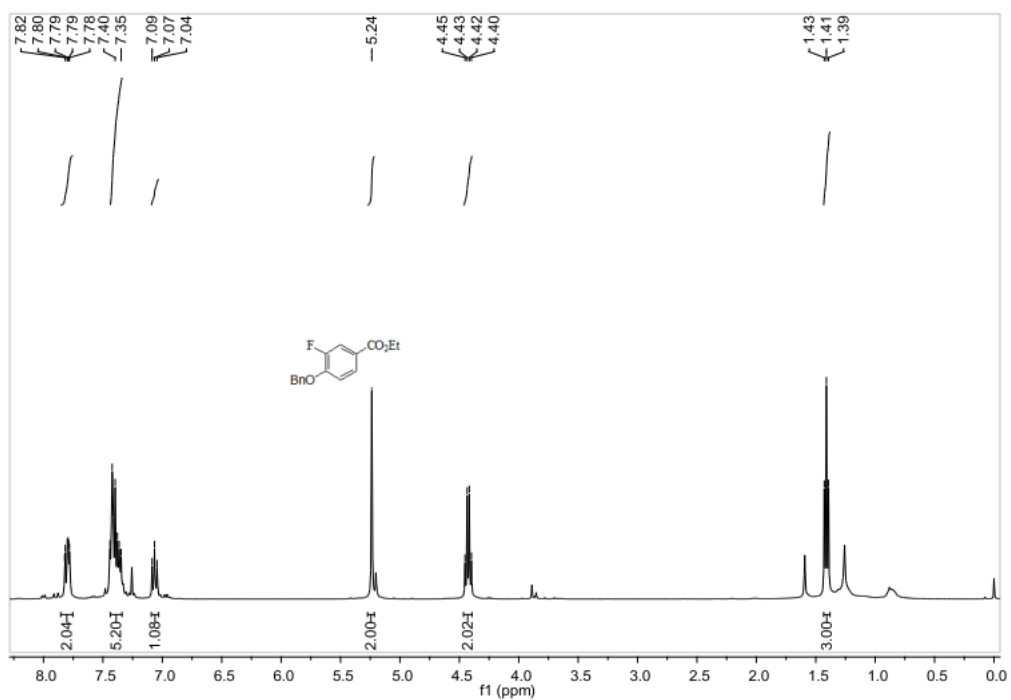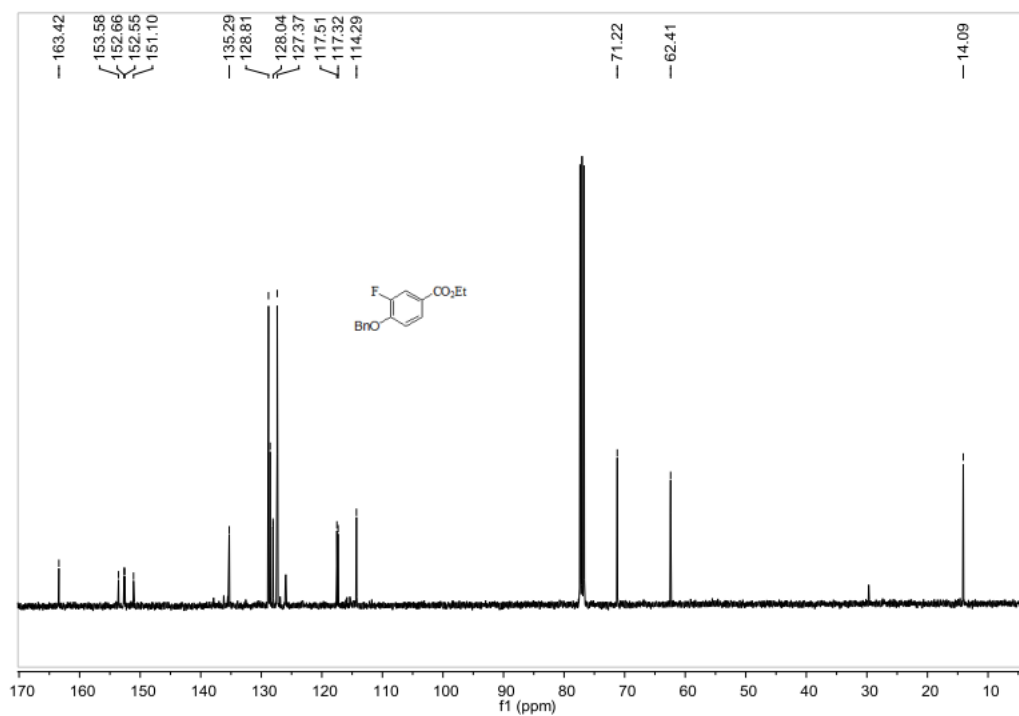

21).  $^1\text{H}$  NMR and  $^{13}\text{C}$  NMR Spectrum for 4-ethyl 1-methyl 2-methoxyterephthalate **3r** (Using  $\text{CDCl}_3$  as solvent)

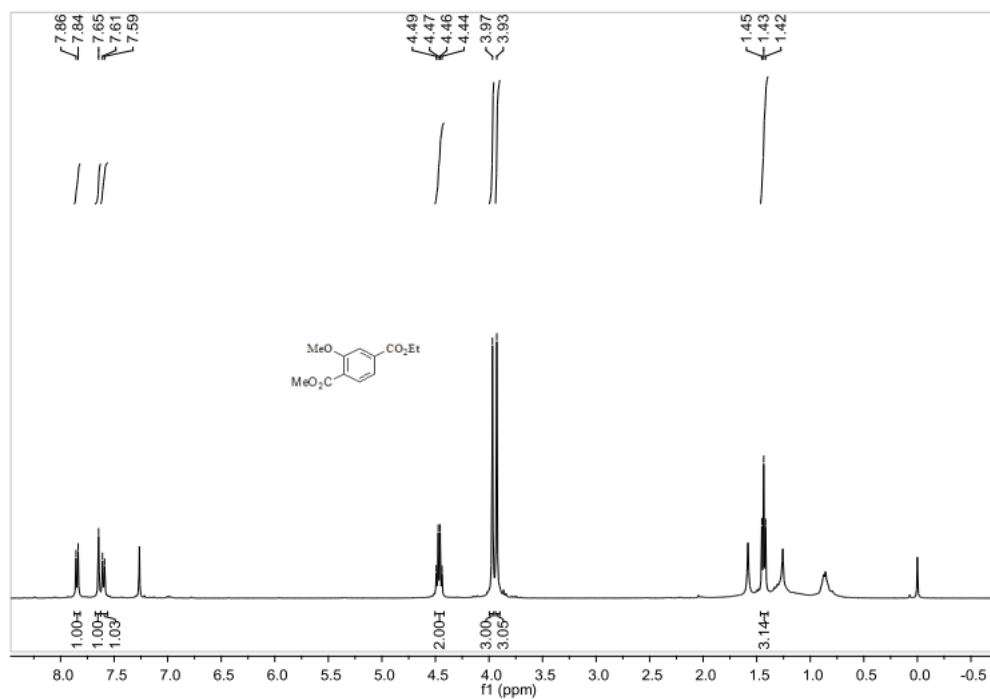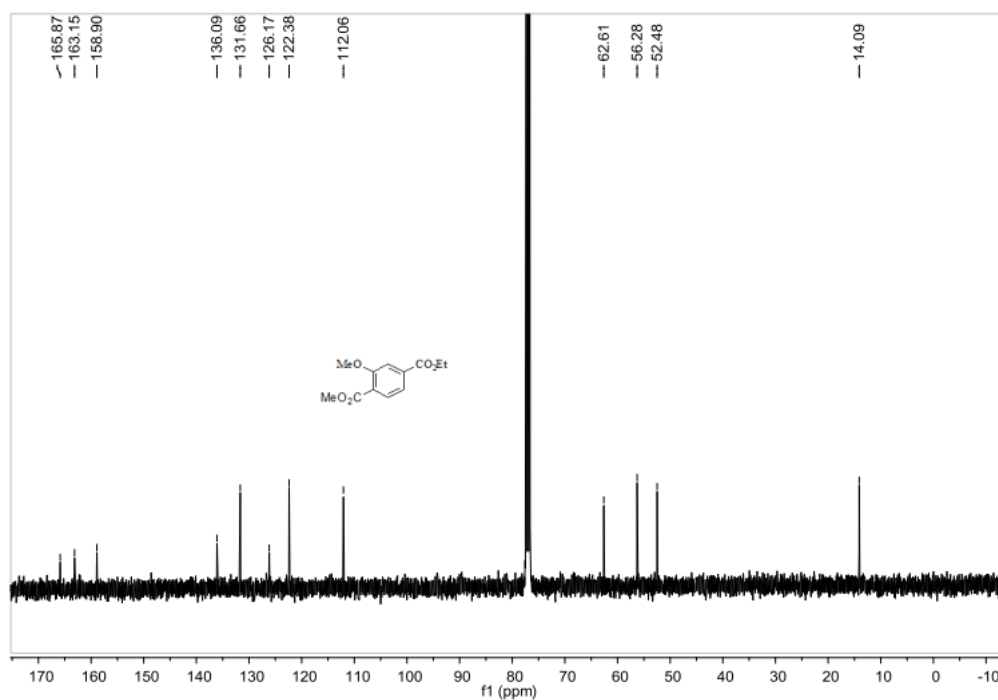

22).  $^1\text{H}$  NMR and  $^{13}\text{C}$  NMR Spectrum for ethyl 4-acetylbenzoate **3s** (Using  $\text{CDCl}_3$  as solvent)

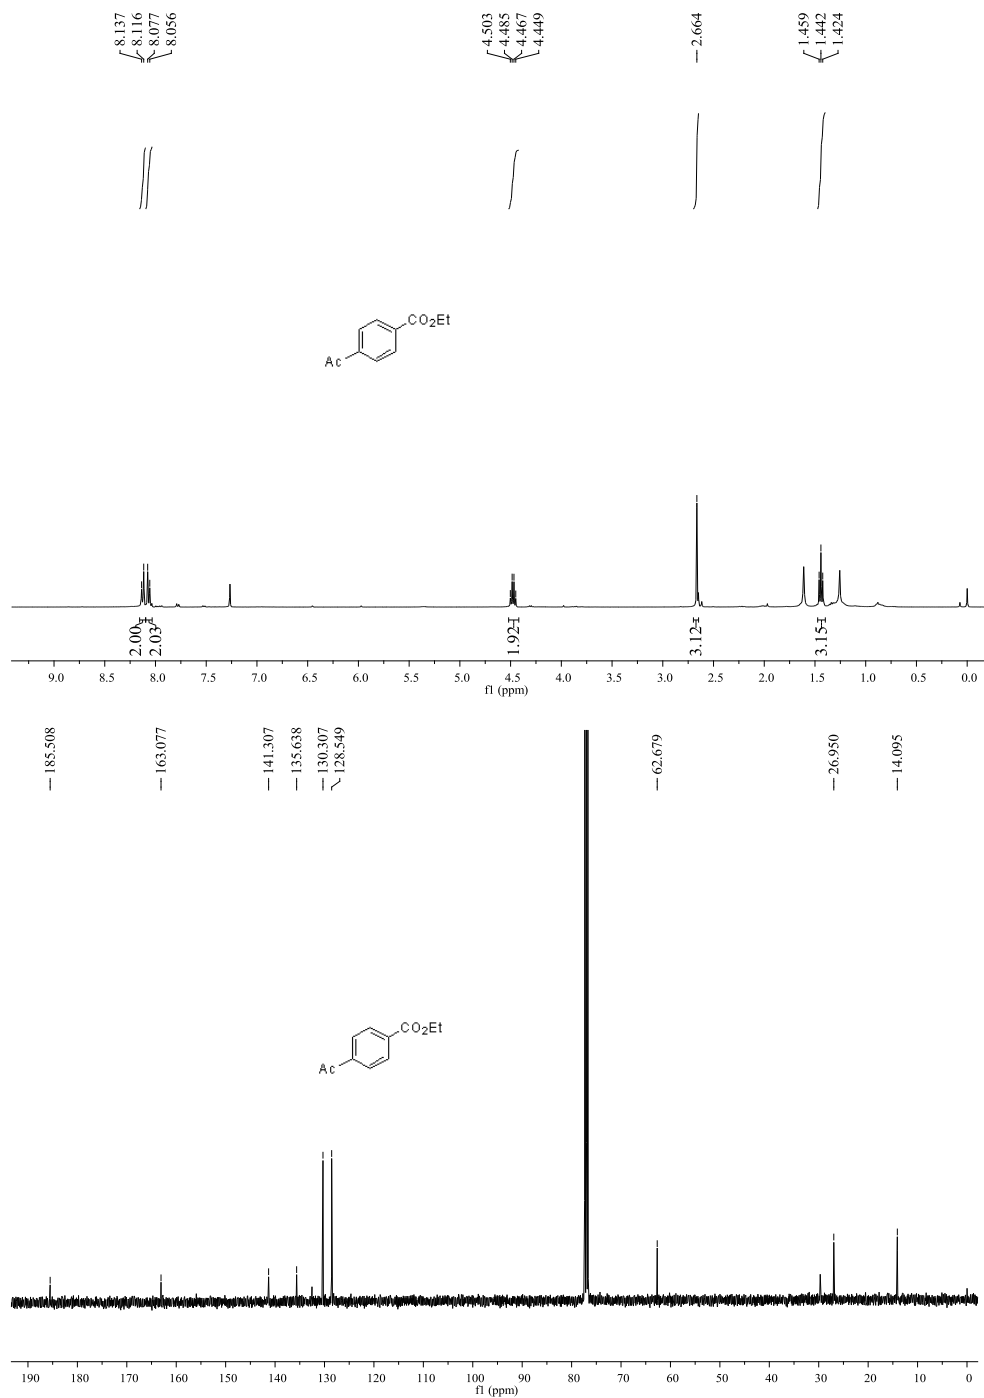

23).  $^1\text{H}$  NMR and  $^{13}\text{C}$  NMR Spectrum for ethyl benzo[d][1,3]dioxole-5-carboxylate **3t** (Using  $\text{CDCl}_3$  as solvent)

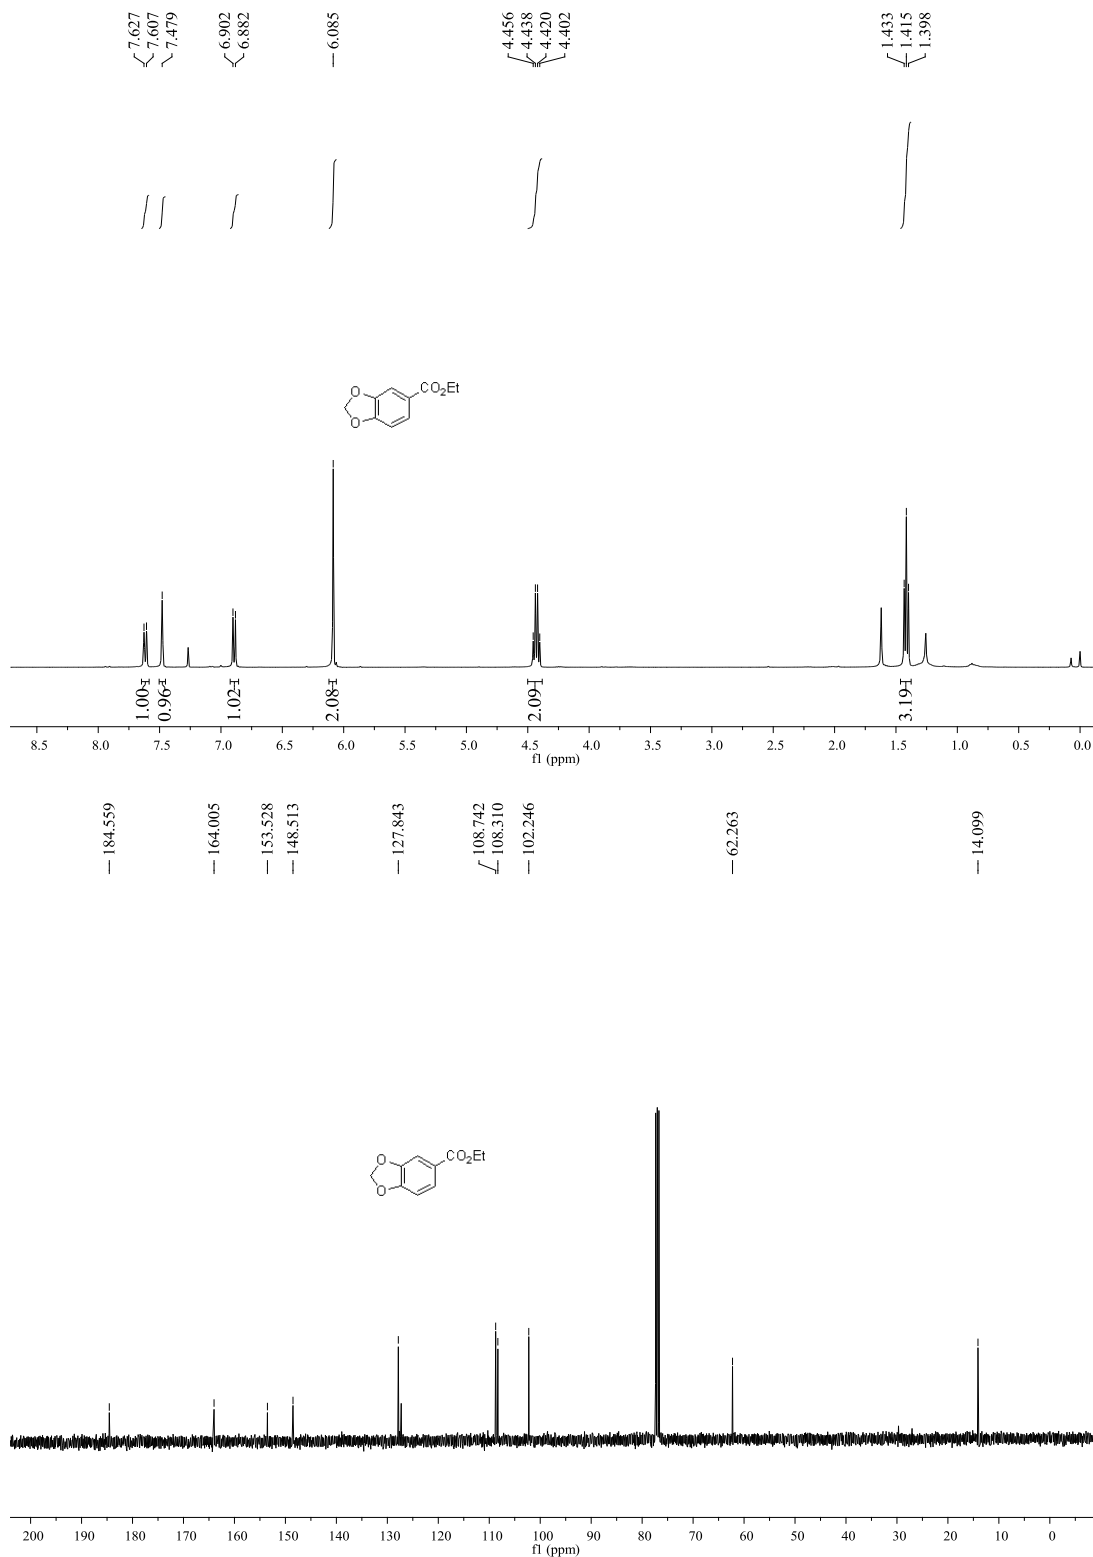

24).  $^1\text{H}$  NMR and  $^{13}\text{C}$  NMR Spectrum for ethyl thiophene-3-carboxylate **3u** (Using  $\text{CDCl}_3$  as solvent)

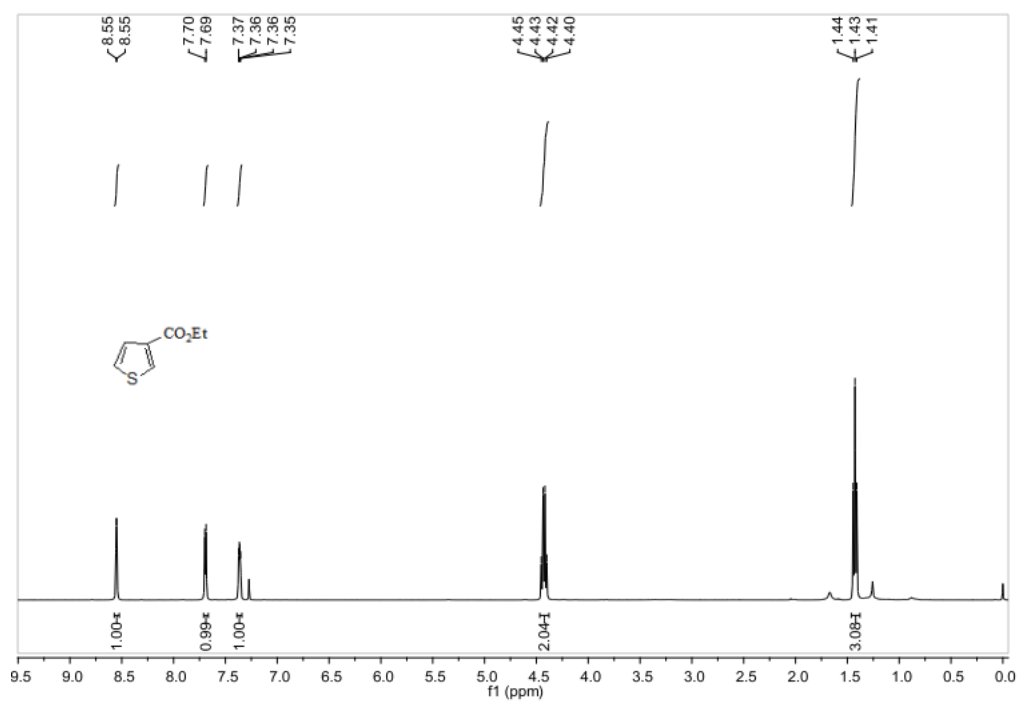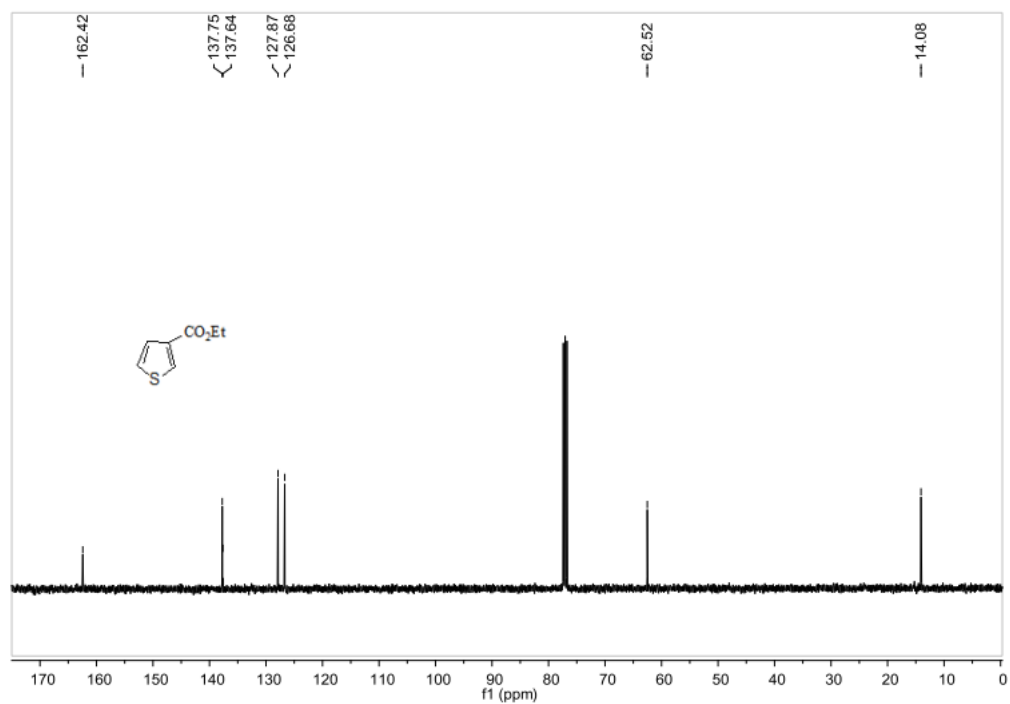

25).  $^1\text{H}$  NMR and  $^{13}\text{C}$  NMR Spectrum for ethyl thiophene-2-carboxylate **3v** (Using  $\text{CDCl}_3$  as solvent)

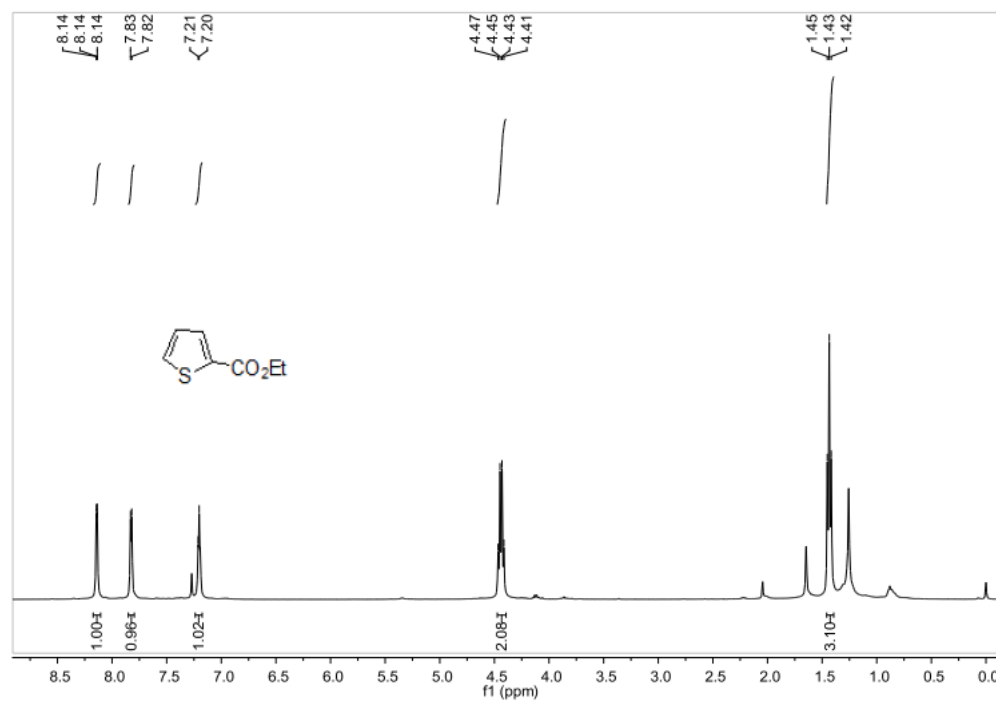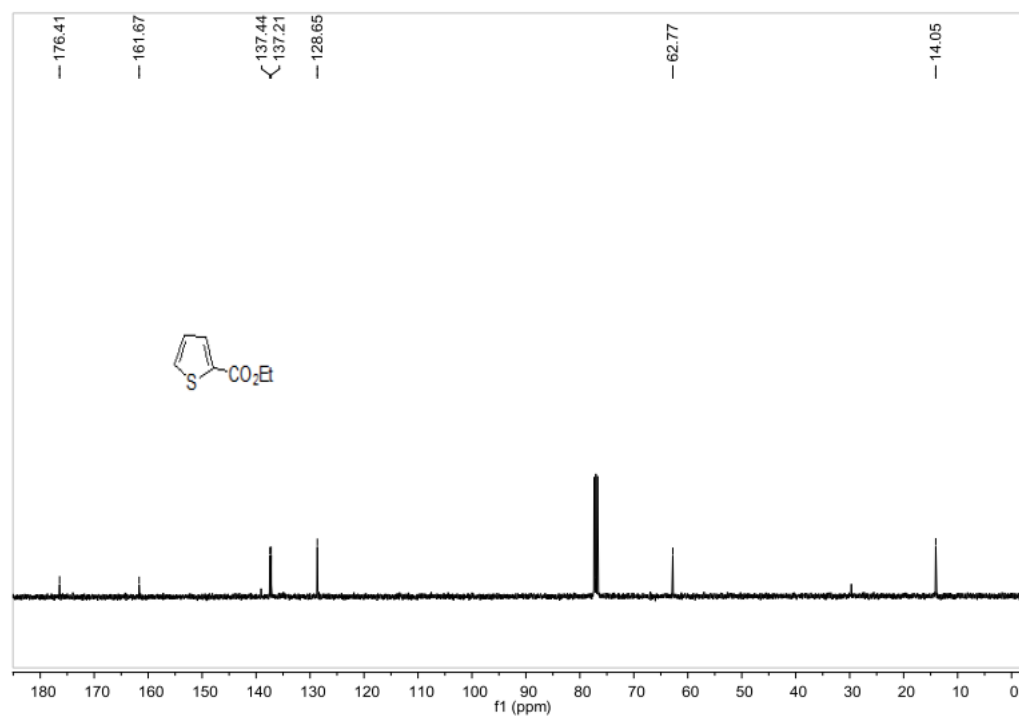



26).  $^1\text{H}$  NMR and  $^{13}\text{C}$  NMR Spectrum for ethyl benzo[*b*]thiophene-2-carboxylate **3w** (Using  $\text{CDCl}_3$  as solvent)

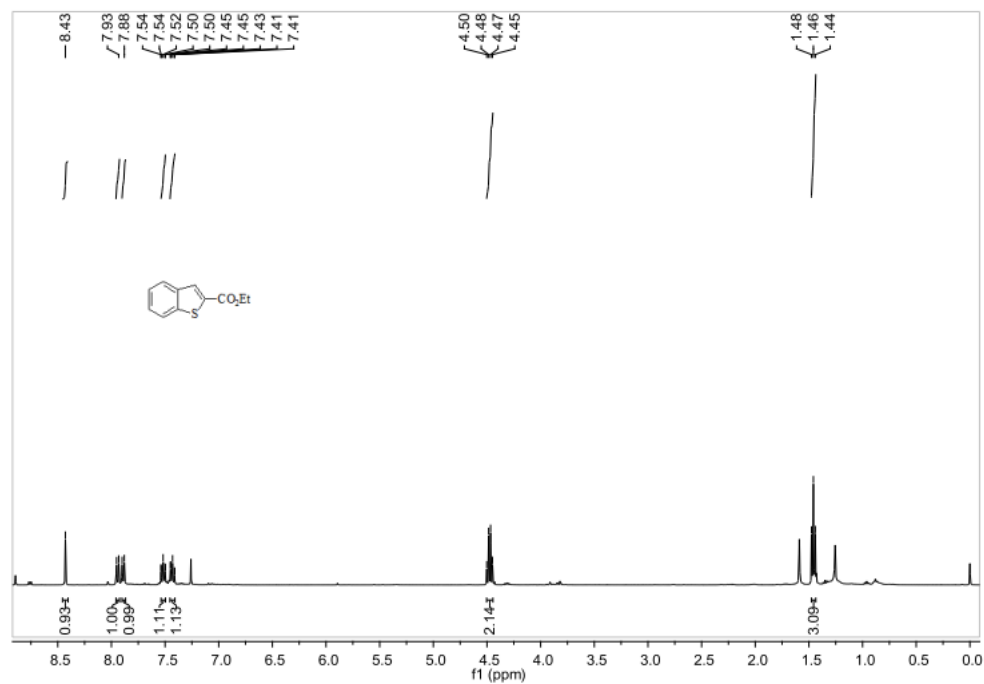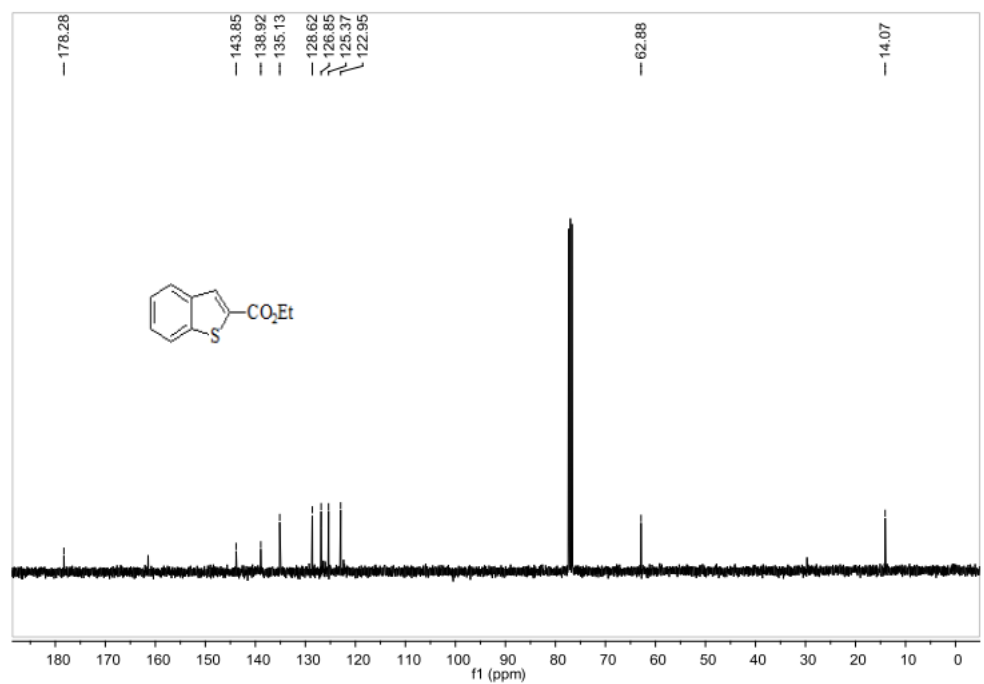

27).  $^1\text{H}$  NMR and  $^{13}\text{C}$  NMR Spectrum for ethyl 2-((4-methoxyphenyl)amino)-2-(*p*-tolyl) acetate **2aa** (Using  $\text{CDCl}_3$  as solvent)

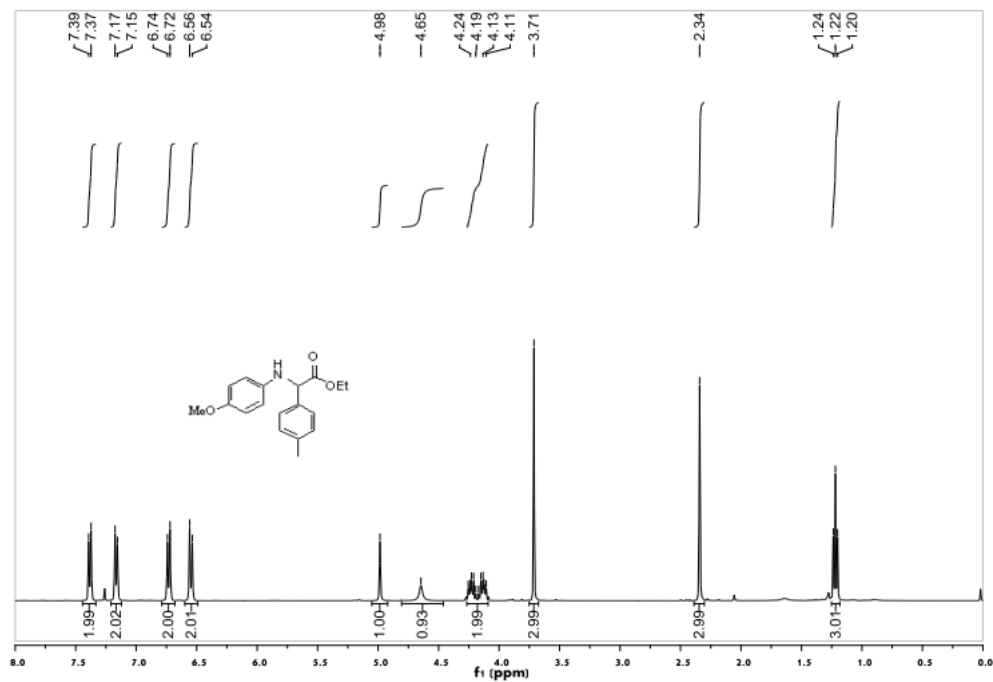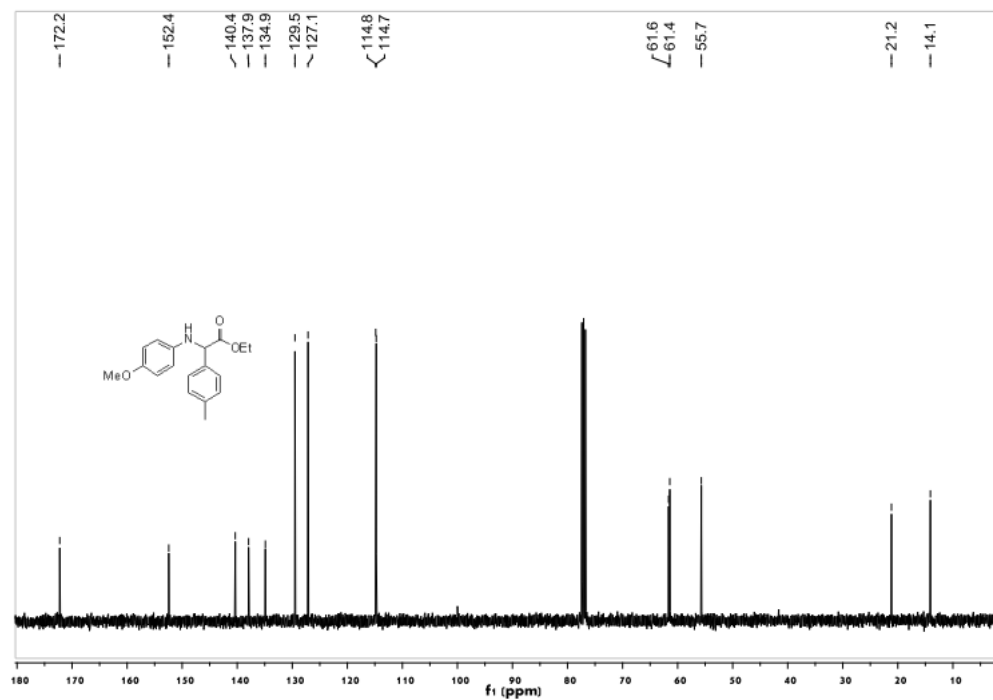

28).  $^1\text{H}$  NMR and  $^{13}\text{C}$  NMR Spectrum for 4-methoxy-*N*-(2-nitroethyl) benzenamine **4b** (Using  $\text{CDCl}_3$  as solvent)

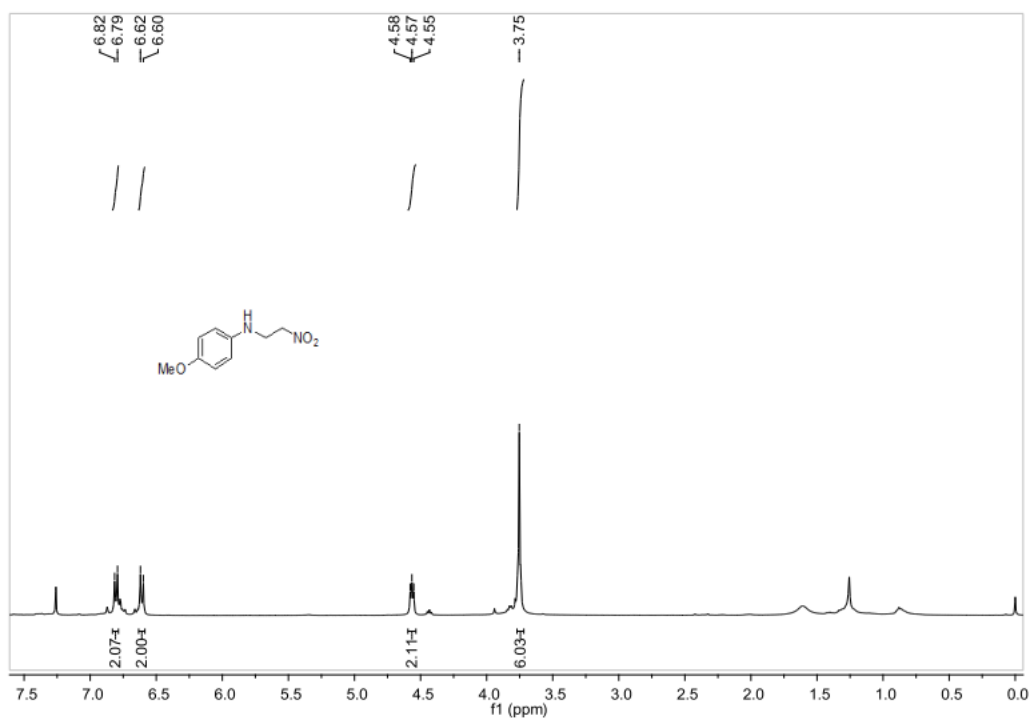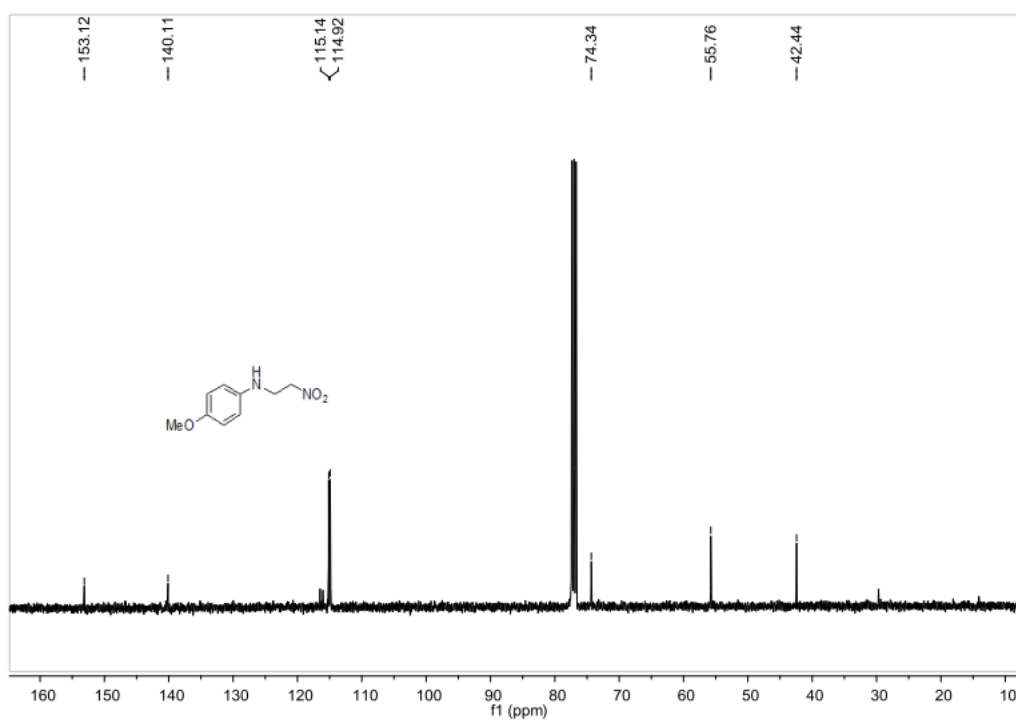

29).  $^1\text{H}$  NMR and  $^{13}\text{C}$  NMR spectrum for **P2b** (Using  $\text{CDCl}_3$  as solvent)

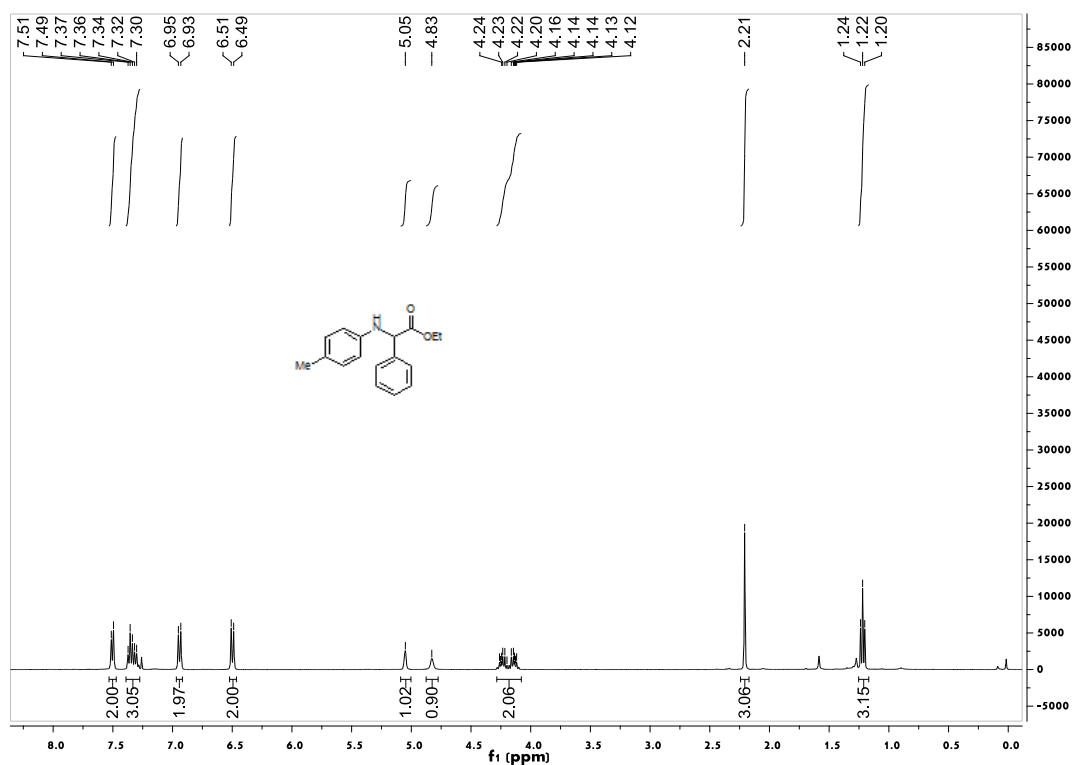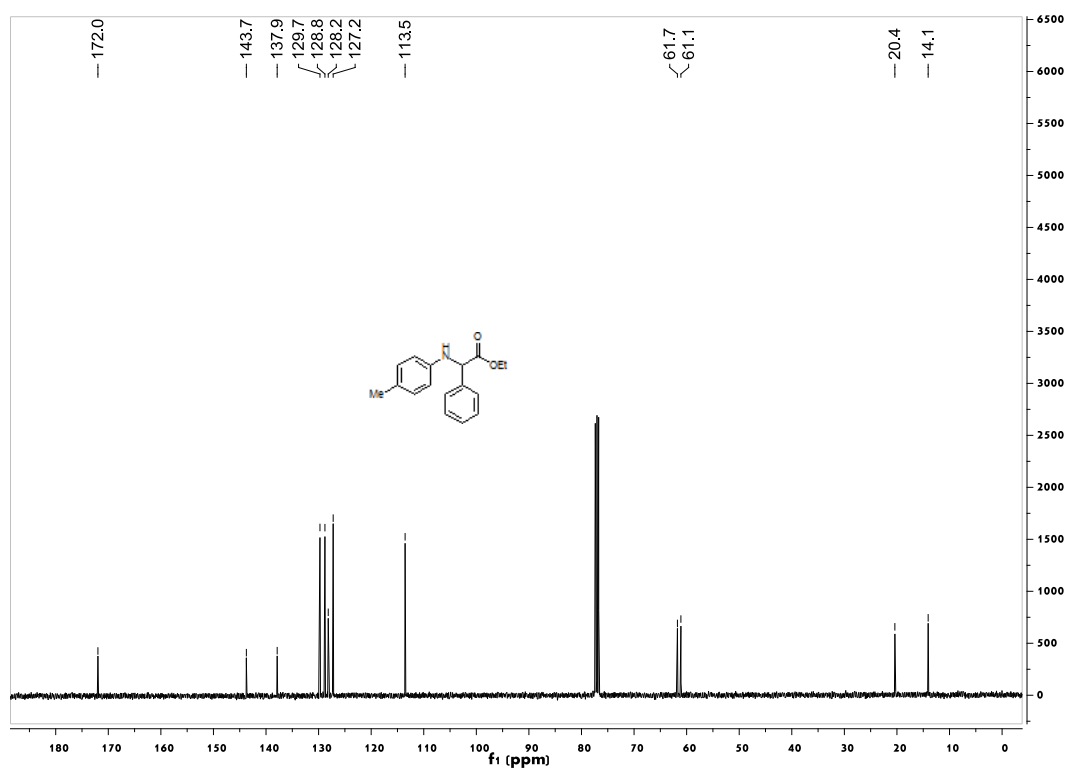

30).  $^1\text{H}$  NMR and  $^{13}\text{C}$  NMR spectrum for **P2c** (Using  $\text{CDCl}_3$  as solvent)

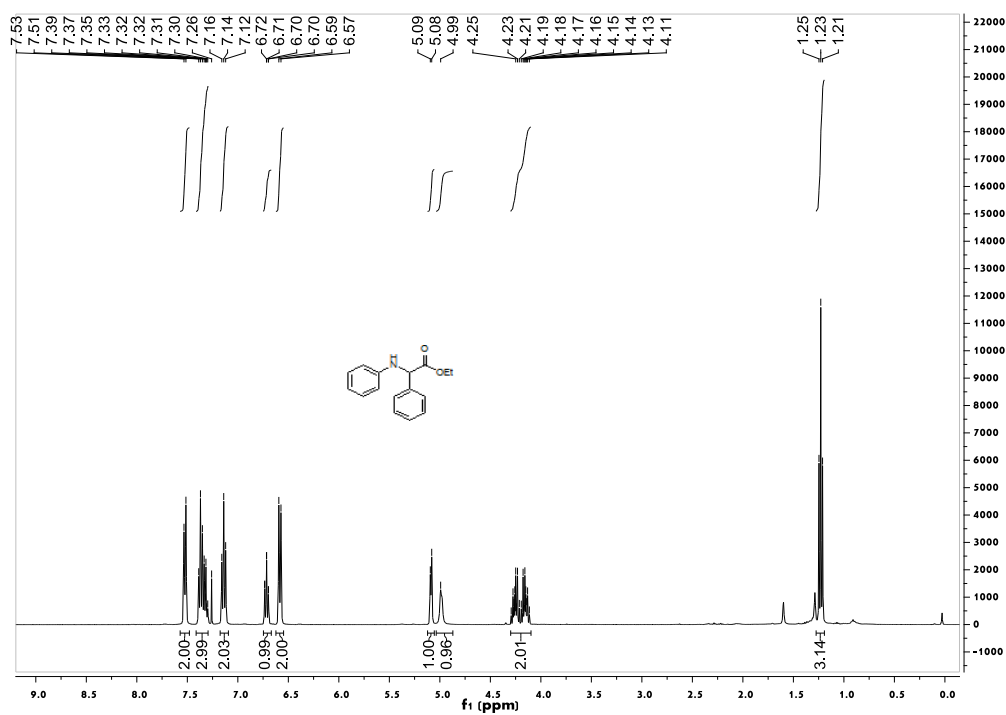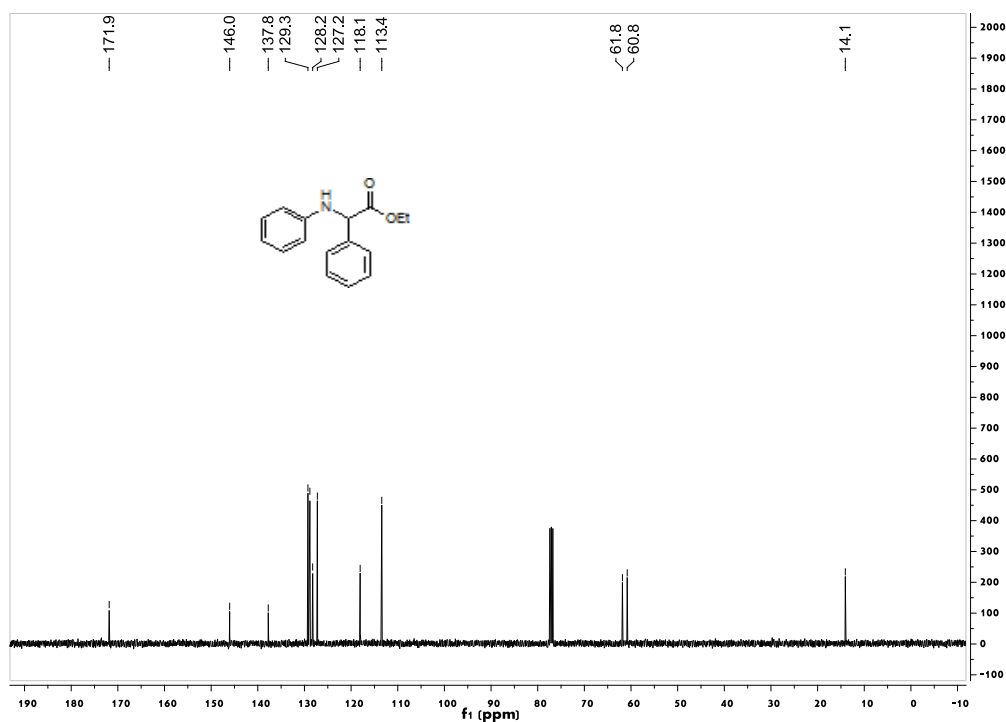

31).  $^1\text{H}$  NMR and  $^{13}\text{C}$  NMR spectrum for **P2d** (Using  $\text{CDCl}_3$  as solvent)

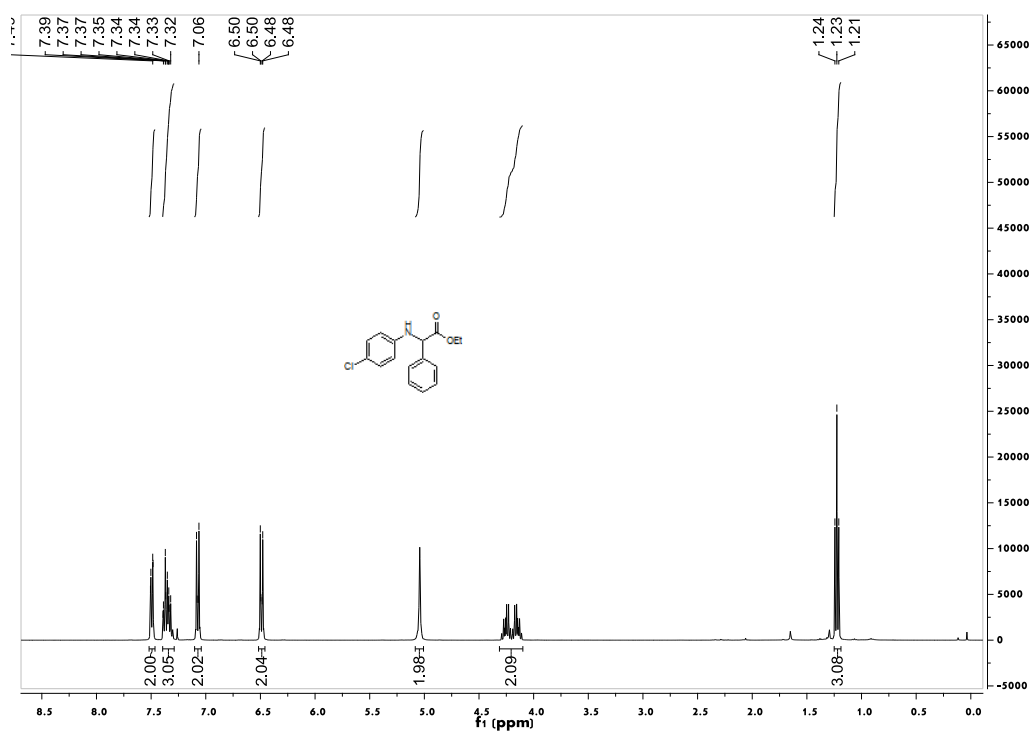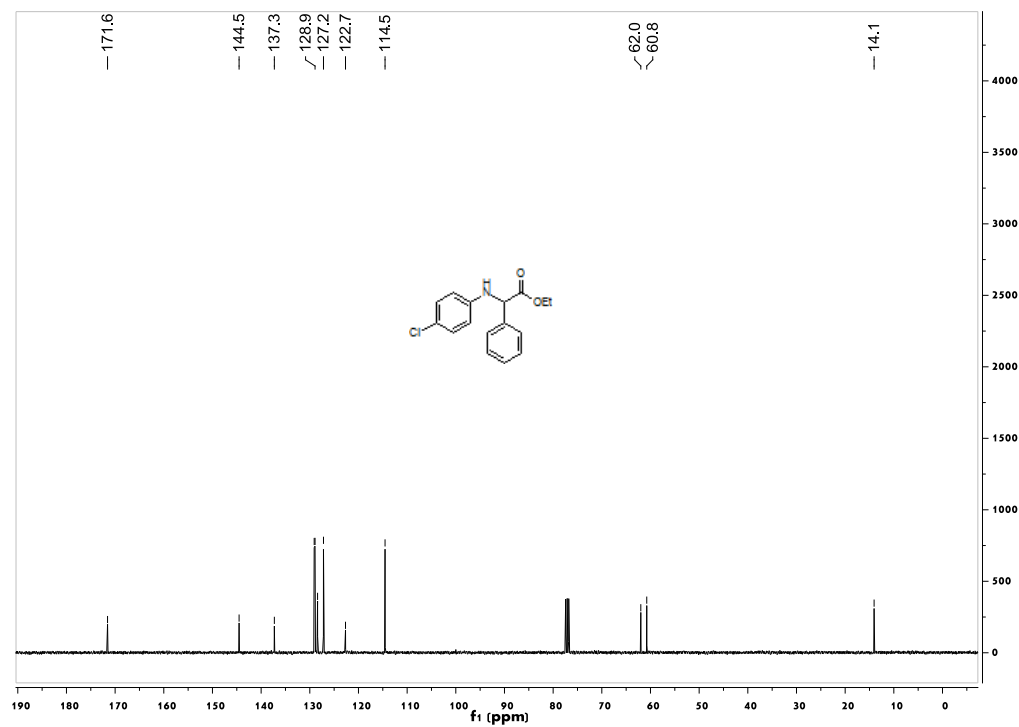

32).  $^1\text{H}$  NMR and  $^{13}\text{C}$  NMR spectrum for **P2e** (Using  $\text{CDCl}_3$  as solvent)

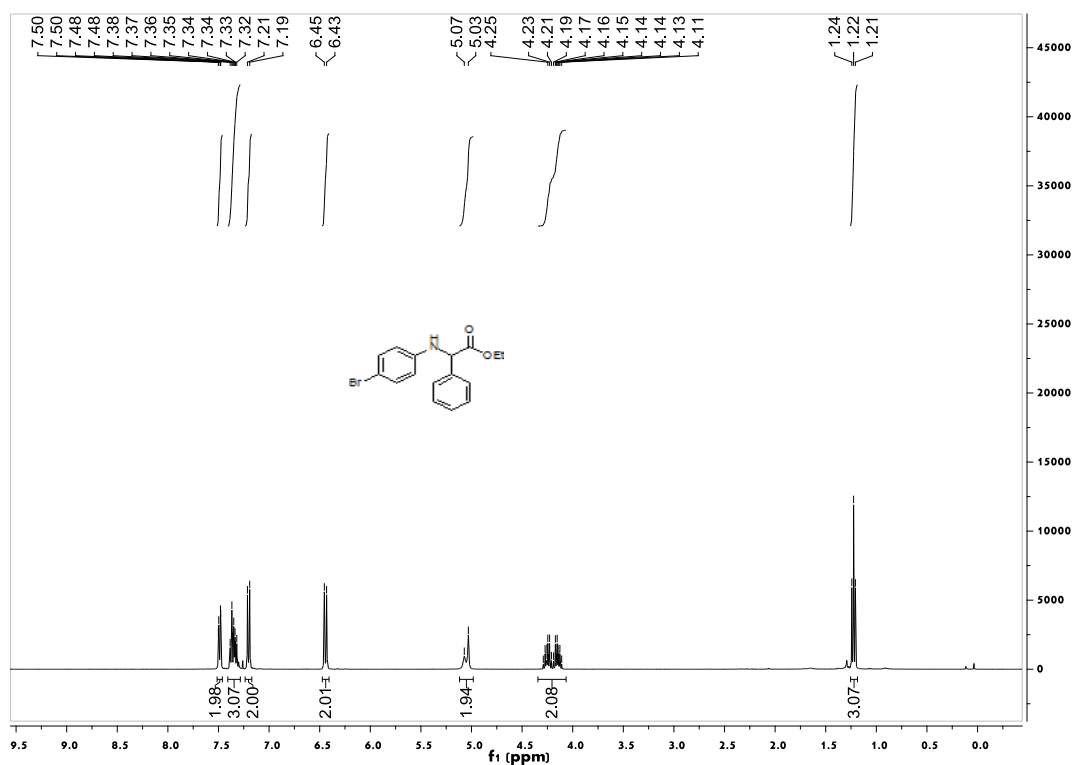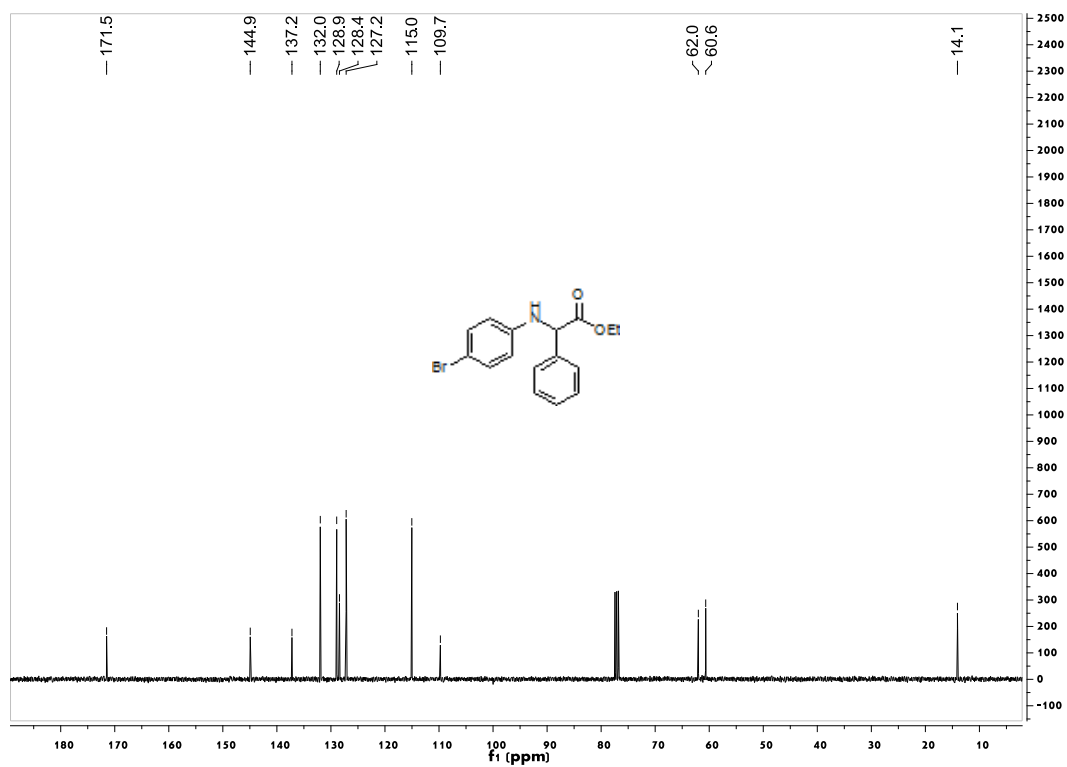

33).  $^1\text{H}$  NMR and  $^{13}\text{C}$  NMR spectrum for **P2f** (Using  $\text{CDCl}_3$  as solvent)

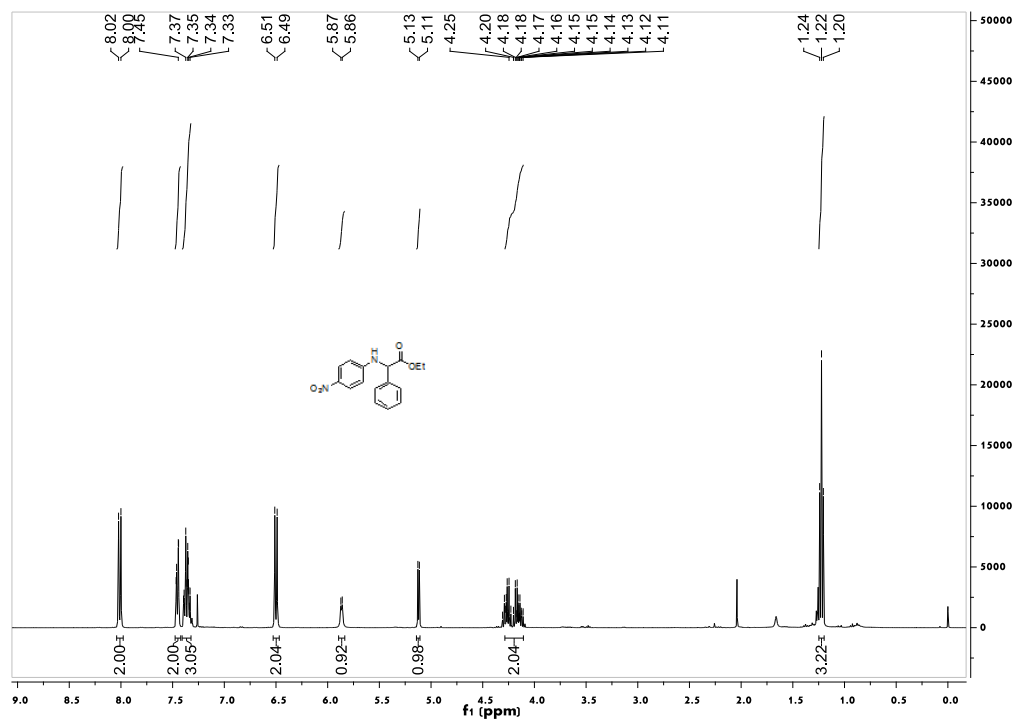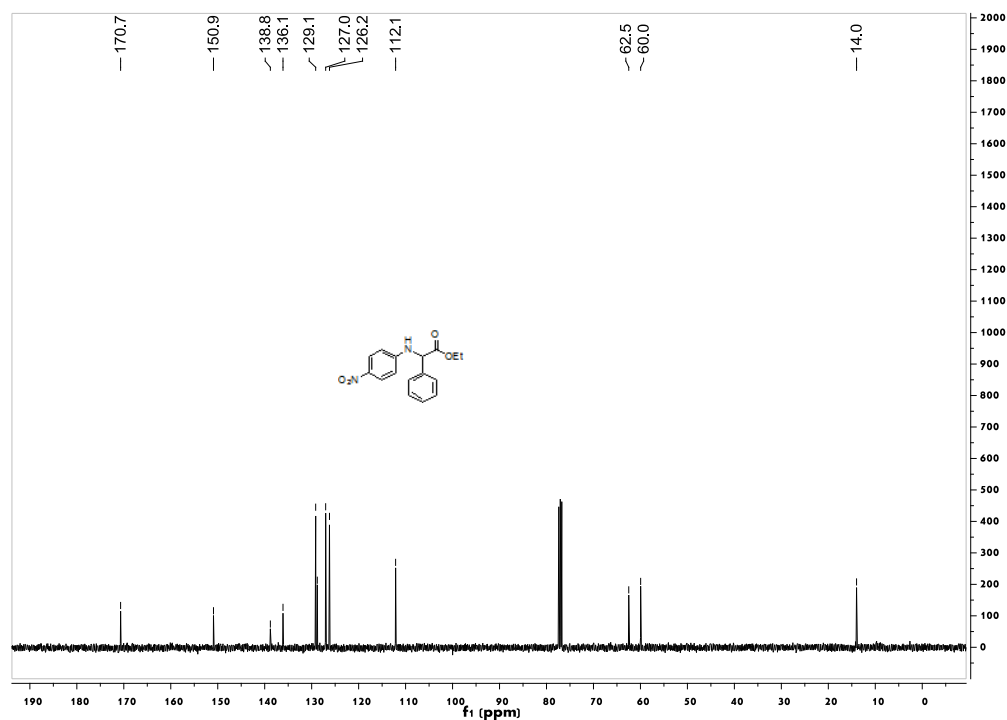

Supplement: c3ob41011k.pdf [file c3ob41011k.pdf]
